1 **High definition DIC imaging uncovers transient stages of pathogen infection**  
2 **cycles on the surface of human adult stem cell-derived intestinal epithelium**

3

4 Jorik M. van Rijn<sup>a,\*</sup>, Jens Eriksson<sup>a,\*</sup>, Jana Grüttner<sup>b</sup>, Magnus Sundbom<sup>c</sup>, Dominic-Luc  
5 Webb<sup>d</sup>, Per M. Hellström<sup>d</sup>, Staffan G. Svärd<sup>b</sup>, Mikael E. Sellin<sup>a,#</sup>

6

7 Affiliations:

8 <sup>a</sup> Science for Life Laboratory, Department of Medical Biochemistry and Microbiology,  
9 Uppsala University, Uppsala, Sweden.

10 <sup>b</sup> Department of Cell and Molecular Biology, Uppsala University, Uppsala, Sweden.

11 <sup>c</sup> Department of Surgical Sciences, Uppsala University, Uppsala, Sweden.

12 <sup>d</sup> Department of Medical Sciences, Gastroenterology and Hepatology Unit, Uppsala  
13 University, Uppsala, Sweden.

14 \* Jorik M. van Rijn and Jens Eriksson contributed equally to this work. Author order was  
15 determined on the basis of seniority.

16 #Correspondence: [mikael.sellin@imbim.uu.se](mailto:mikael.sellin@imbim.uu.se)

17

## 18 **Abstract**

19           Interactions between individual pathogenic microbes and host tissues involve fast  
20 and dynamic processes that ultimately impact the outcome of infection. Using live-cell  
21 microscopy, these dynamics can be visualized to study e.g. microbe motility, binding  
22 and invasion of host cells, and intra-host-cell survival. Such methodology typically  
23 employs confocal imaging of fluorescent tags in tumor-derived cell line infections on  
24 glass. This allows high-definition imaging, but poorly reflects the host tissue's  
25 physiological architecture and may result in artifacts. We developed a method for live-  
26 cell imaging of microbial infection dynamics on human adult stem cell-derived intestinal  
27 epithelial cell (IEC) layers. These IEC monolayers are grown in alumina membrane  
28 chambers, optimized for physiological cell arrangement and fast, but gentle, differential  
29 interference contrast (DIC) imaging. This allows sub-second visualization of both  
30 microbial and epithelial surface ultrastructure at high resolution without using  
31 fluorescent reporters. We employed this technology to probe the behavior of two model  
32 pathogens, *Salmonella enterica* Typhimurium (*Salmonella*) and *Giardia intestinalis*  
33 (*Giardia*), at the intestinal epithelial surface. Our results reveal pathogen-specific  
34 swimming patterns on the epithelium, showing that *Salmonella* adheres to the IEC  
35 surface for prolonged periods before host-cell invasion, while *Giardia* uses circular  
36 swimming with intermittent attachments to scout for stable adhesion sites. This method  
37 even permits tracking of individual *Giardia* flagella, demonstrating that active flagellar  
38 beating and attachment to the IEC surface are not mutually exclusive. Thereby, this  
39 work describes a powerful, generalizable, and relatively inexpensive approach to study

40 dynamic pathogen interactions with IEC surfaces at high resolution and under near-  
41 native conditions.

42

### 43 **Importance**

44 Knowledge of dynamic niche-specific interactions between single microbes and  
45 host cells is essential to understand infectious disease progression. However, advances  
46 in this field have been hampered by the inherent conflict between the technical  
47 requirements for high resolution live-cell imaging on one hand, and conditions that best  
48 mimic physiological infection niche parameters on the other. Towards bridging this  
49 divide, we present methodology for differential interference contrast (DIC) imaging of  
50 pathogen interactions at the apical surface of enteroid-derived intestinal epithelia,  
51 providing both high spatial and temporal resolution. This alleviates the need for  
52 fluorescent reporters in live-cell imaging and provides dynamic information about  
53 microbe interactions with a non-transformed, confluent, polarized and microvilliated  
54 human gut epithelium. Using this methodology, we uncover previously unrecognized  
55 stages of *Salmonella* and *Giardia* infection cycles at the epithelial surface.

56

### 57 **Introduction**

58 Although infectious diseases of the intestine are often caused by large  
59 populations of invading pathogens, disease progression and outcome are ultimately  
60 dictated by the interactions of individual microbes with the host tissues. To characterize  
61 the complex dynamics of these underlying interactions, live cell microscopy has become  
62 the method of choice. However, it is intrinsically difficult to study dynamic microbe

63 interactions with internal host tissues such as the intestinal epithelium *in vivo*. The  
64 resolution of *ex vivo*-based microscopy techniques often suffers from the complexity  
65 and depth of intact tissues, resulting in the need for more phototoxic high-dosage  
66 illumination or complex and expensive 2-photon setups. Therefore, researchers have  
67 turned to transformed or immortalized cell lines to study intestinal epithelial infections in  
68 cultured proxies of the gut epithelium. These cell lines often fail to recapitulate key  
69 features of intestinal epithelial cell (IECs) layers, such as a densely-packed polarized  
70 morphology, a microvilliated apical surface, and sensitivity to cell-death mechanisms,  
71 but have nevertheless uncovered a wealth of information about pathogen infection  
72 cycles (1–6). By contrast, the impact of physiologically relevant host cell and tissue  
73 parameters on infection dynamics remains understudied.

74         In the past decade, cultured organoid models have been shown to provide a  
75 powerful intermediate for this physiological gap between cell lines and intact primary  
76 tissues. The central features of the gut epithelium are faithfully recapitulated in both  
77 intestinal organoids derived from pluripotent stem cells (PSCs) (7, 8), and in so called  
78 enteroids or colonoids derived from adult epithelial stem cells (ASCs) of small intestine  
79 or colon, respectively (9, 10). Organoid models can be cultured in a variety of two- and  
80 three-dimensional (2D and 3D) settings (11, 12) and retain non-transformed cell  
81 behavior over time (13, 14).

82         Despite their potential, organoid models have so far only been sparsely used for  
83 live cell imaging of intestinal infection processes (15–17). In our experience, this is a  
84 result of the difficulty to adapt current imaging approaches from cell line infections to  
85 accommodate the properties of physiologically grown organoid-derived epithelia. First,

86 while cell lines can be grown flat on glass culture ware for optimal working distance and  
87 numerical aperture, intestinal organoid-derived IECs only develop into their natural  
88 polarized arrangement when cultured within rich extracellular matrices (ECMs), or atop  
89 permeable supports. The latter can be accommodated by ECM-coated transwell inserts  
90 with permeable membranes of Polyethylene Terephthalate (PET) or similar polymers as  
91 a 2D substrate (18, 19). Enteroid/Colonoid-derived IEC layers in such transwell inserts  
92 can be efficiently cultured, differentiated, and infected by a variety of gut pathogens  
93 (20–28), but are poorly compatible with live cell imaging. Secondly, non-transformed  
94 cells are difficult to manipulate genetically, which complicates introduction of fluorescent  
95 tags to visualize the host cell and its subcellular architecture by fluorescence microscopy.  
96 Finally, in contrast to tumor-derived cell lines, non-transformed cells retain sensitive cell  
97 death and stress signaling pathways, which makes them susceptible to phototoxicity  
98 and other perturbations and introduces a need for gentle imaging conditions. Taken  
99 together, these constraints have limited the applicability of live cell imaging to  
100 characterize encounters of pathogens with the apical portion of non-transformed IEC  
101 layers at high spatial and temporal resolution.

102 Here, we present a new method to visualize microbial infection cycle dynamics at  
103 the apical surface of ASC-derived IEC layers under near-native conditions. To  
104 overcome the imaging constraints introduced by PET transwells, we developed a  
105 method to grow microvilliated human epithelium layers on ECM-coated alumina  
106 membranes in 3D-printed imaging chambers. In addition, we omitted the need for  
107 fluorescent tagging and high-dosage illumination by optimizing the conditions for high  
108 resolution, live differential interference contrast (DIC) microscopy. The use of DIC rather

109 than more phototoxic fluorescent reporter approaches favors physiologic pathogen and  
110 host cell behavior and allows simultaneous visualization of both individual microbes and  
111 IEC surface ultrastructure without the need for channel switching. Finally, we used this  
112 method to map *Salmonella enterica* Typhimurium (*Salmonella*), and *Giardia intestinalis*  
113 (*Giardia*) infection cycles atop the epithelial surface and describe previously  
114 unrecognized single-microbe behaviors during IEC attachment. Thereby, we show that  
115 this imaging methodology enables detailed, dynamic studies of both microbe and host  
116 cell behavior at the interface of gut infection, adaptable even to genetically non-tractable  
117 microorganisms.

118

## 119 **Results**

### 120 ***An alumina membrane chamber enables high-definition live cell DIC imaging at*** 121 ***the apical border of intestinal epithelial cell layers***

122 We developed a method for live cell imaging of microbe interactions with non-  
123 transformed human ASC-derived intestinal epithelial cell layers, aiming to combine i)  
124 high structural definition, ii) high temporal resolution, iii) gentle imaging conditions to  
125 avoid phototoxicity and the need for fluorescent reporters, and iv) a confluent, polarized  
126 IEC arrangement. To achieve this, we sought to improve upon the constraints presented  
127 by PET transwell supports to DIC imaging (Fig 1A). Specifically, the PET membrane  
128 depolarizes light, the pores in the membranes diffract light, and the plastic membrane  
129 holder prevents close approach of the microscope objective to the apical side of the  
130 IECs, thereby constraining the working distance and numerical aperture. Therefore, a  
131 suitable alternative to PET membranes should not introduce optical interference for

132 imaging within the visual spectrum, but like PET membranes should be permeable to  
133 permit efficient epithelial cell polarization. In addition, the membrane holder should allow  
134 close proximity of both the objective and condenser to the epithelial surface to optimize  
135 the numerical aperture of the system.

136         This led us to evaluate membranes of anodized aluminium oxide (alumina) as a  
137 candidate substrate. Alumina forms a dense honeycomb-like structure with parallel,  
138 sub-diffraction limit sized pores (Fig S1A), and is optically transparent when wet. Unlike  
139 for PET membranes, the pores cannot be distinguished by light microscopy and the  
140 alumina does not depolarize transmitted light (Fig S1B). Although alumina membranes  
141 poorly support cell adhesion, various adhesion-enhancing surface modifications have  
142 been reported for this material (29–31). We found that surface hydroxylation followed by  
143 sequential coating with poly-L-lysine and Matrigel enabled efficient attachment and  
144 expansion of human ASC-derived IECs atop the alumina membranes (Fig S1C; see  
145 methods for details). Furthermore, IECs grown on coated alumina membranes  
146 developed into confluent, highly polarized monolayers, reflecting *in vivo* epithelium  
147 architecture (Fig S1D). To hold the alumina membrane in place during cell culture, we  
148 designed a 3D-printable plastic chamber (Fig 1B). The design of the chamber can easily  
149 be adapted to alternative applications, and design files are freely available for download  
150 (will be available upon publication). Like a regular transwell, the chamber creates a cell  
151 culture area in the middle, but the height of the chamber was kept slim to match the  
152 working distance of a water-dipping objective, thereby removing air-liquid interfaces  
153 within the light path. In addition, the chamber allows the objective and especially the  
154 condenser to be placed in close proximity to the sample, hence maximizing the

155 utilization of the condenser's numerical aperture and thus improving the lateral  
156 resolution of DIC imaging.

157 To test if this alumina membrane chamber (AMC) and upright microscope setup  
158 indeed improved the quality of live DIC imaging of epithelial infection, we compared this  
159 system to the existing PET transwell supports. Human IEC monolayers were grown and  
160 differentiated atop PET transwells, or in AMCs, and the apical compartment was  
161 infected with wild-type *Salmonella*. The PET transwells were imaged using either a  
162 standard inverted DIC microscope and an oil-immersion objective (Fig 1C), or the PET  
163 membrane cut out from the holder for imaging with the upright water-dipping objective  
164 setup (Fig 1D). Infections in the AMCs were imaged in parallel using the same upright  
165 system (Fig 1E). As expected, the contrast and resolution of both the apical IEC surface  
166 and the *Salmonella* was poor for PET transwells imaged through the inverted  
167 microscope (Fig 1F-G), but markedly improved through the water-dipping upright  
168 system (Fig 1H-I). However, residual optical interference from the PET membrane was  
169 still evident, resulting in image blurring. Moreover, the need to cut-out the PET  
170 membrane prior to imaging complicated sample handling, increased risk of mechanical  
171 cell damage, and caused the loose membrane to float with convection currents in the  
172 imaging medium, which prevented stable image acquisition over time.

173 The AMC markedly improved on all these imaging issues by providing a stable  
174 surface, minimizing the optical interference from membrane pores, and allowing easy  
175 handling underneath the water-dipping objective. As such, DIC imaging of live, infected  
176 IEC monolayers in AMCs showed distinct contrast of *Salmonella* atop the cell surface  
177 (Fig 1J). When focusing on the IEC surface itself, we observed clearly demarcated cell-



178 cell junctions and a remarkable roughness made up of contrasting punctae (Fig 1K),  
179 suggestive of a densely microvilliated surface. To correlate the live DIC image with the  
180 IEC surface topology, we disassembled non-infected and *Salmonella*-infected AMCs  
181 and imaged the epithelial monolayers therein also by scanning electron microscopy  
182 (SEM). This provided a powerful, near-correlative setup, as SEM analysis could be  
183 done on the same AMC samples used for live DIC. SEM images captured at similar  
184 magnification validated the appearance of the apical epithelial surface in live DIC mode,  
185 both with respect to the macro-topology of cell junctions, the slight height differences  
186 between cells, and the distinctly patterned apical surface (compare figure 1K and L). At  
187 higher SEM magnification, we observed a richly microvilliated surface (Fig 1M), with  
188 preserved binding of *Salmonella* to the host cells (Fig 1N).

189 In conclusion, the combination of an upright water-dipping objective microscope  
190 and the novel AMC provide a system for simultaneous high definition DIC imaging of  
191 both microbe- and host cell- features at the apical surface of human intestinal epithelial  
192 cell layers. This approach does not require the use of fluorescent dyes or labeled  
193 markers, and allows for convenient semi-correlative SEM on samples fixed at the end of  
194 live cell imaging.

195

### 196 ***Resolving sub second-scale microbial motility patterns along the apical surface*** 197 ***of human intestinal epithelium***

198 Pathogenic gut microbes often use flagellar motility to reach and explore the  
199 epithelial surface. Motile pathogen behaviors have typically been studied atop artificial  
200 surfaces (e.g. plastic or glass) (3, 32), or occasionally under more physiological

201 conditions (e.g. atop tissue explants (33)). However, under the latter conditions the  
202 imaging method relies on fluorescent reporters and high-intensity illumination that come  
203 at the price of phototoxicity, and may alter the processes under study, or do not permit  
204 simultaneous surface structure visualization. The AMC setup presented here should be  
205 ideally suited to study authentic pathogen motility patterns at the IEC surface under  
206 minimally perturbing conditions. To leverage this possibility, we explored motility of two  
207 microbes atop IEC monolayers grown in AMCs: the smaller bacterial pathogen  
208 *Salmonella*, and the larger protozoan parasite *Giardia*.

209 Peritrichous flagella-driven *Salmonella* motility physically constrains stretches of  
210 the bacterial swim path atop surfaces – a phenomenon called near-surface swimming  
211 (NSS) (3). Using DIC imaging alone, we could successfully follow *Salmonella* NSS  
212 along the apical surface of the epithelium with high frame rates (up to ~30 frames/sec)  
213 at modest light intensity, and with simultaneous visualization of apical epithelial topology  
214 (Fig 2A, top row panel). Although bacterial NSS could easily be tracked manually based  
215 on the DIC images alone, greyscale images cannot be readily thresholded for  
216 automated downstream analysis by particle tracking software, as would be the norm for  
217 fluorescence imaging (Fig S2A; (34)). We therefore incorporated a squared temporal  
218 median ( $TM^2$ ) post-processing filter (see methods) to extract bacterial NSS information  
219 from the background of the relatively static apical IEC topology. The resulting filtered  
220 image stack enabled both segmentation of motile bacteria and automated particle  
221 tracking without the use of fluorescent markers (Fig 2A - bottom row panels, movie will  
222 be provided upon publication). Automated tracking of *Salmonella* NSS in the  $TM^2$   
223 filtered stack showed a variety of curved tracks with a mean speed of 34.7  $\mu\text{m/s}$  (Fig 2B,

224 Fig S2C) and mean turning angle of  $\sim 14.68^\circ/15 \mu\text{m}$  clockwise (Fig S2E), corresponding  
225 to its flagella's counterclockwise spin (35, 36). Reassessment of this pattern by  
226 fluorescence imaging resulted in broadly similar tracks (Fig S2A,C), but importantly did  
227 not allow simultaneous visualization of epithelial surface topology. These observations  
228 validate and extend previous studies of *Salmonella* motility (3, 33, 36–38), by mapping  
229 *Salmonella* NSS parameters atop a physiologically arranged epithelial surface and  
230 under minimally perturbing conditions.

231 *Giardia* trophozoites feature four pairs of flagella, and use motility to swiftly  
232 approach the intestinal epithelium, followed by stable attachment using a ventral disk  
233 (39, 40). *Giardia* free-swimming motility in medium involves flexion of the caudal portion  
234 of the parasite body (32). On flat surfaces (i.e. glass), *Giardia* adapt the swimming  
235 mode to planar motility, largely driven by the flagella. Planar motility in this context is  
236 defined by a swimming pattern with the ventral disk continuously in the same plane as  
237 the attachment surface (32, 41). As these *Giardia* motility characteristics remain inferred  
238 from more simplistic experimental conditions (40), we performed live DIC imaging of  
239 early *Giardia* motility atop IEC monolayers within AMCs. Again, we could  
240 simultaneously visualize the IEC surface and individual *Giardia* trophozoites, and follow  
241 parasite movements at a variety of frame rates (Fig 2C, top row panels). The lower  
242 contrast and less predictable swim paths noted for these bigger protozoans, as  
243 compared to *Salmonella*, were not well suited for automated particle tracking. However,  
244 an unsquared temporal median filtering (TM) step aided robust manual segmentation  
245 and tracking of *Giardia* motility (Fig 2C - bottom row panels, movie will be provided upon  
246 publication). This revealed epithelium-proximal swimming in curved or circular tracks

247 with a mean speed of 38.6  $\mu\text{m/s}$  (Fig 2D, Fig S2D) and an almost straight mean turning  
248 angle of  $0.41^\circ/15 \mu\text{m}$ , but with a large standard deviation in both the clockwise and  
249 counterclockwise direction (Fig S2F). We validated these findings also by fluorescence  
250 imaging of mNeonGreen-labelled *Giardia* and automated particle tracking (Fig S2B,D).  
251 The speed values aligned well with the maximal speeds measured for *Giardia* during  
252 free-swimming in media (up to  $\sim 40 \mu\text{m/s}$ ; (32)). This indicates that when first  
253 approaching a polarized microvilliated epithelium, *Giardia* sustains maximal swim speed  
254 for a significant period after switching to planar 2D motility.

255 Taken together, we demonstrate that DIC imaging in AMCs provides a powerful  
256 solution for resolving microbial motility patterns atop a human intestinal epithelial cell  
257 layer. Specifically, this methodology simultaneously captures both apical IEC layer  
258 topology and single microbe behaviors at high frame rates, does not require fluorescent  
259 labelling, and as such avoids both potential problems with reporter toxicity/phototoxicity,  
260 as well as the temporal delays that come with switching between multiple imaging  
261 channels. Moreover, the AMC imaging technology will allow in-depth analysis of how  
262 microbial motility on the epithelial surface is impacted by physiologically relevant  
263 surface features (e.g. crevices formed at cell-cell junctions, extruding IECs etc.).

264

265 ***Longer-term imaging reveals a previously unrecognized Salmonella Typhimurium***  
266 ***infection cycle stage atop the epithelial surface***

267 Following NSS, *Salmonella* can adhere to the epithelial surface through a  
268 combination of transient interactions via dedicated adhesins and/or flagella, and stable  
269 docking to the plasma membrane via type-III-secretion system-1 (TTSS-1) (42–45).

270 Docking of the TTSS-1 tip subsequently permits the translocation of bacterial effector  
271 proteins into the host cell cytoplasm (1). A rich body of work in epithelial cell line models  
272 has shown that this leads to the near-instantaneous induction of large actin-dependent  
273 membrane ruffles and swift *Salmonella* invasion of the targeted cell (1). However,  
274 recent work has also shown that the induced invasion structure phenotype is dependent  
275 on the context of the host cell, and suggests a relation between invasion phenotype and  
276 host cell polarization status (46). It therefore remains less well understood how the  
277 physiological properties of intact non-transformed epithelia may impact *Salmonella*  
278 infection cycle stage(s) at the host cell surface.

279 To survey the longer-term fate(s) of *Salmonella* on IECs, we performed one-hour  
280 infections of AMC chamber-grown IEC monolayers. In the resulting movies, we  
281 observed an abundance of non-motile bacteria on the surface of the IEC monolayer (Fig  
282 3A). The accumulation of bacteria on the cell surface occurred in a time-dependent  
283 manner, and they most often remained attached for the duration of the experiment. On  
284 occasion a bacterium was seen to clearly detach, indicating that not all bacteria  
285 successfully formed stable docking interactions with the epithelial surface. Surprisingly,  
286 stable immobilization of the bacteria only rarely led to successful invasion of the  
287 monolayer (Fig 3A). Instead, this analysis uncovered prolonged lingering of *Salmonella*  
288 atop the epithelial surface as the predominant behavior, even enabling bacterial division  
289 of attached bacteria upon the apical surface (Fig S3). This contrasts sharply to similar  
290 experiments in non-polarized epithelial cell line models, where ruffle-dependent  
291 *Salmonella* entry begins within seconds to minutes post-attachment (example movie will  
292 be provided upon publication) (3, 46). Nevertheless, IEC invasion could still be detected

293 in the AMC-grown IEC monolayers, albeit at lower-than-expected frequency. Some  
294 bacteria disappeared from the focal plane without obvious morphological changes to the  
295 IEC surface (Fig 3B, top row panels). We could for this category not unequivocally  
296 distinguish between sudden detachment or IEC invasion in the absence of overt surface  
297 perturbation. In other cases, we observed unambiguous *Salmonella* invasion through a  
298 small digitated IEC surface rim transiently formed around the bacterium (Fig 3B - middle  
299 row panels, movie will be provided upon publication), or through somewhat more  
300 pronounced donut-like ruffles which begun resembling those elicited in *Salmonella*-  
301 infected polarized MDCK cells (Fig 3B, bottom row panels) (46–48).

302         Successful entry of the bacterium was occasionally followed by prompt neighbor-  
303 coordinated extrusion of the targeted IEC from the monolayer (Fig 3C). The extrusion  
304 phenotype and timeframe corresponded well with the extrusions we previously reported  
305 in *Salmonella*-infected 3D enteroids (15), and which have also been observed *in vivo*  
306 (49–51). Again, using DIC imaging alone, the morphological changes in both the  
307 extruding IEC and the neighboring cells could be traced over time (Fig 3C).

308         In conclusion, our results show that imaging of epithelial infection within AMCs  
309 opens up new avenues for the microscope-aided study of bacterial behavior at the  
310 apical border of a human IEC layer, compatible with both short (sub-second) and long  
311 (hours or more) time scales. By employing this technology, we find that *Salmonella* do  
312 not invade a physiologically arranged human IEC layer as easily as what has been  
313 described for tumor-derived cell line infection models. Instead, stable and prolonged  
314 bacterial colonization of the IEC surface constitutes a significant infection cycle stage,  
315 which only for a fraction of the bacteria converts into productive IEC invasion. The

316 molecular and physiological basis for these observations constitutes an intriguing area  
317 for future research.

318

319 ***Giardia alternates between rapid swimming and intermittent attachment during***  
320 ***local surface exploration***

321 Earlier reports of *Giardia* behavior on glass have described the trophozoites' pre-  
322 attachment swimming pattern as circular movements, largely driven by beating of the  
323 anterior and ventral flagella and steered by lateral bending of the caudal region (32, 41).  
324 Although the eventual attachment of *Giardia* has been validated in numerous reports  
325 (40, 52), and also in epithelial cell line cultures (5, 53), exploratory trophozoite behavior  
326 that leads to successful stable attachment has not yet been studied atop an intact  
327 epithelial surface.

328 Therefore, we homed in on individual *Giardia* swim tracks in IEC layer regions  
329 that harbored both moving and stably adhered trophozoites (Fig 4A, attached *Giardia*  
330 indicated by arrows in top panel). The subset of motile *Giardia* was observed to swim in  
331 circular tracks which gradually shifted their position on top of the monolayer (Fig 4B).  
332 From these tracks, the link speed was calculated as the displacement divided by the  
333 time interval between two subsequent frames. Unlike for the patterns described on  
334 glass (32, 41), we observed a remarkably high link speed variation for this pre-  
335 attachment swimming, with an average of 31.98  $\mu\text{m/s}$  ranging up to  $\sim 155 \mu\text{m/s}$  (Fig S4).  
336 Over time, these tracks scanned repeatedly over a local region of the epithelium (Fig  
337 4A, track).

338 To study how this swimming behavior relates to IEC attachment, we carefully  
339 followed the link speed variation over each full track. This revealed that trophozoites in  
340 planar swimming mode occasionally slowed down to a full stop on certain areas of the  
341 monolayer (Fig 4B, black arrows). Interestingly, we also found that trophozoites often  
342 repeatedly visited a certain location, coming to a brief stop with each pass across that  
343 particular stretch of surface (Fig 4B, white arrow). This suggests that some areas of the  
344 IEC monolayer may possess properties more favorable to attachment than others. It  
345 seems plausible that the highly repetitive circular pre-attachment swim patterns we  
346 observe will maximize the parasite's ability to find such ideal attachment sites within a  
347 given epithelial region.

348 With four pairs of flagella and an adhesive ventral disk, *Giardia* behavior at a  
349 surface is the result a complicated interplay of propulsion and adhesive forces. Aside  
350 from their role in propulsion, flagellar movement has been described to influence correct  
351 positioning of the adhesive disk on the attachment surface, although the exact  
352 mechanism of that process remains a topic of discussion (32, 52). To test if our AMC  
353 imaging setup would allow studies of individual flagella movements within the context of  
354 epithelial infection, we imaged individual *Giardia* atop the IEC monolayer at high frame  
355 rate. We found that DIC imaging alone was indeed sufficient to distinguish the  
356 movement of individual flagella on intermittently attached trophozoites (Fig 4C, top  
357 panel). Application of the TM filter further facilitated manual segmentation of individual  
358 flagella (Fig 4C - middle panel, movie will be provided upon publication), and the  
359 imaging resolution was sufficient to indicate the movement of all four pairs of flagella  
360 over time (Fig 4C, middle and bottom panel). This allowed us to determine that all of the



361 anterior, posterolateral, and ventral flagella exhibit continued movement also in  
362 intermittently attached *Giardia* on IEC monolayers. Consequently, intermittent *Giardia*  
363 pausing at the IEC surface is not caused by the temporary cessation of flagellar beating.  
364 This finding also illustrates the power of the AMC imaging technology to resolve  
365 dynamic host-pathogen interactions under near-native conditions even with subcellular  
366 resolution.

367

## 368 **Discussion**

369       Recent work has shown that intestinal organoid-derived monolayers grown on  
370 permeable supports provide a physiologically relevant culture model for host-pathogen  
371 interaction, applicable to both bacteria (21–26, 28), parasites (27), and viruses (20). In  
372 this context, organoids bridge the gap between the complexity and polarized nature of  
373 the epithelium encountered *in vivo* and the convenient (yet sometimes  
374 misrepresentative) properties of continuous cultured cell lines. Furthermore, 2D  
375 organoid cultures offer an attractive alternative to 3D culture specifically for studies of  
376 microbe interactions with the apical cell surface. The latter can be microinjected (15, 54,  
377 55), fragmented (56), or inverted (57), but because of the 3D-topology these structures  
378 are better suited for population-scale dynamics than single-microbe behavior in a stable  
379 apical plane. While live-cell imaging of microbe dynamics has been published on  
380 monolayers of continuous cell lines (3, 47, 58) and to an extent in microinjected 3D  
381 enteroids (15), dynamic behaviors of microbes at the surface of a physiologically  
382 arranged human intestinal epithelium remain poorly investigated. We show that this  
383 short-coming can be explained by the inherent conflict between the technical

384 prerequisites for high-definition light microscopy (e.g. a short working distance, a thin  
385 specimen, and an optically inert substrate) and the current best practices for  
386 establishment of polarized IEC layer cultures.

387         Therefore, we here developed a custom imaging chamber based on a coated  
388 alumina membrane substrate. This AMC is compatible with water-dipping objective  
389 imaging to maximize optical resolution, while the alumina membrane has optical  
390 properties superior to permeable plastic cell culture supports. With these improvements  
391 to the ASC-derived IEC monolayer culture system, we present an optimized method for  
392 high-definition imaging of host - microbe interactions at the apical surface of a confluent,  
393 polarized, non-transformed, human gut epithelium. Finally, we used this technique to  
394 uncover previously unknown behaviors of both *Salmonella* and *Giardia* on IEC  
395 monolayers.

396         Our AMC imaging model allows tracing of the behavior of individual *Salmonella*  
397 cells over time from the moment they come in proximity to the apical cell surface.  
398 Previous work using continuous cell lines and *in vivo* infection models have shown that  
399 flagella-dependent *Salmonella* motility drives the approach towards host cells (37, 59)  
400 and initiates subsequent NSS-behavior in search of suitable entry sites (3, 33). Our  
401 findings regarding *Salmonella*'s curved NSS atop IEC monolayers (Fig 2A,B; Fig  
402 S2A,C,E) agree with this model of approach. However, in contrast to observations in  
403 e.g. HeLa cells, we found that successful binding to the IEC monolayer does not  
404 necessarily lead to prompt ruffle-mediated invasion (Fig 3A). Rather, we observed that  
405 the bacteria often remain attached without invading within an hour post-infection. From  
406 our current observations, it is not clear if this binding is reversible and adhesin-

407 dependent, or rather comprises irreversible TTSS-1-mediated docking (42). The  
408 molecular obstacle(s) that make polarized non-transformed IECs more challenging to  
409 invade than typical cell lines constitutes an intriguing area for further enquiry. The  
410 prolonged bacterial attachment also suggests an additional biologically relevant  
411 epithelial colonization stage in the infection cycle of *Salmonella*, in apparent analogy to  
412 attaching-effacing enteropathogens that use the epithelial surface as a primary  
413 colonization niche (60).

414         Nevertheless, we still observed *Salmonella* invasion of IECs (Fig 3B), albeit at  
415 lower-than-expected frequency and often through entry structures that were smaller and  
416 more transient than previously noted for infections of flat-growing cell lines (example  
417 movie will be provided upon publication; (46)). This is in line with the more ‘discreet’  
418 mode of *Salmonella* TTSS-1-dependent IEC invasion described in the intact mouse  
419 intestine (46). In agreement with literature (17, 49–51, 61–64), we also observed that  
420 successful invasion of the monolayer can lead to immediate extrusion of the infected  
421 IEC (Fig 3C). When combined with tools for targeted epithelial cell differentiation,  
422 bacterial and mammalian genetics, we expect the AMC imaging technology to provide a  
423 framework for deciphering bacterial IEC invasion mechanics and the IEC extrusion  
424 response in a near-native epithelial context.

425         Previous studies of *Giardia* infections have shown that the motile trophozoites  
426 can attach to both inert substrates like glass (40) and to microvilliated cell surfaces *in*  
427 *vivo* (65) and in culture (5). Research on interaction dynamics of *Giardia* with inert  
428 substrates have shown that flagellar motility is essential for motility, cell division, and  
429 selection of suitable attachment sites (32, 41, 52, 66, 67), although this behavior has not

430 yet been studied in real time on live cells. We here report the first study of *Giardia*  
431 swimming on top of cultured cells, and on polarized IEC monolayers at that. In general  
432 agreement with earlier studies on glass (32), we found that *Giardia* exhibits circular,  
433 planar swimming above the attachment surface. Specifically, we found that *Giardia*  
434 planar swimming speeds average around 30-40  $\mu\text{m/s}$  with short bursts of up to 155  
435  $\mu\text{m/s}$  (Fig S4). These speeds are much higher than pre-attachment swimming that has  
436 been characterized before on glass (32, 41, 67–69). Furthermore, we see circular  
437 swimming interceded by short stretches of straight swimming (Fig 4A). Finally, we show  
438 that trophozoite planar swimming along the epithelial surface leads to intermittent,  
439 transient, attachments to the host cells (Fig 4B). Some of these attachments were seen  
440 to repeatedly occur in the same location on the epithelial surface. Therefore, our results  
441 suggest that *Giardia* planar swimming is geared towards a local surface-scanning  
442 pattern, optimized to select a suitable attachment site within a given region. The circular  
443 swimming pattern could aid in this process by repeatedly visiting promising sites of  
444 adhesion, until an unknown threshold of stable adhesion is reached. Earlier work on  
445 glass has elegantly shown that flagellar beating is instrumental to the planar swimming  
446 behavior of *Giardia*, although the respective contribution of the anterior, posterolateral,  
447 and ventral pair is still a matter of debate (32, 41). Strikingly, temporal median filtering in  
448 our study resolved the continued movements of both anterior, posterolateral, and  
449 ventral flagella in intermittently surface-attached *Giardia* (Fig 4C). Although we cannot  
450 directly measure attachment force, this suggests that the transient *Giardia* pauses  
451 during surface search can be explained by ventral disk or ventrolateral flange (65, 70)  
452 engagement with the surface, rather than by an on-off behavior of flagellar propulsion.

453 As the AMC imaging method can be used to study both the overall swim patterns and  
454 the movement of individual flagella, this technique is ideally suited to characterize the  
455 complete spectrum of *Giardia* (and other parasite) behaviors atop intestinal epithelia.

456 Finally, the AMC imaging method can be adapted to accommodate a variety of  
457 different host cell types and microbes. As we have shown that the coated alumina  
458 membrane supports the growth of ASC-derived human enteroid monolayers, the current  
459 system can likely be used to grow a variety of embryonic stem cell-, iPSC- and ASC-  
460 derived epithelia. This would allow for high-definition imaging of microbial interactions  
461 with any stem cell-derived human epithelium culture (e.g. airway, mammary gland,  
462 stomach, or bladder epithelium, see (12) for a comprehensive overview). As ASC-  
463 derived organoids retain the locational and functional identity (71) from the donor  
464 material, this methodology could also be used to study the impact of congenital  
465 disorders of the epithelium (like some forms of Very Early Onset Inflammatory Bowel  
466 Disease) on microbial infection. Lastly, recent studies have reported an adapted  
467 chamber for ASC-derived intestinal organoid monolayer co-culture with gut anaerobes  
468 (26). Innovations like this open the door to even better modeling of both resident and  
469 pathogenic microbes under even more physiologically accurate conditions. However, it  
470 remains difficult to study dynamic interactions with the host epithelium in this context, as  
471 most gut microbiota strains cannot yet be genetically modified to incorporate fluorescent  
472 markers. Our AMC approach to image microbe interactions with the intestinal epithelium  
473 without fluorescence could here provide a stepping stone for dynamic analysis of host  
474 epithelium - microbiota interactions in the coming years.

475

476 **Materials & methods**

477 ***Ethics statement***

478 Human jejunal ASC-derived enteroids were generated from resected tissue  
479 acquired from routine bariatric surgery, following prior informed consent. All personal  
480 information was pseudonymized, and the patients' identities were unknown to  
481 researchers working with the tissue samples. These procedures were approved by the  
482 local governing body (Etikprövningsmyndigheten, Uppsala, Sweden) under license  
483 number 2010-157 with addendums 2010-157-1 (2018-06-13) and 2020-05754 (2020-  
484 10-26)

485

486 ***Alumina Membrane Chambers***

487 The Alumina Membrane Chambers (AMCs) for 13 mm alumina Whatman  
488 Anodisc membranes with 0.2  $\mu\text{m}$  pores (GE Healthcare, Little Chalfont, UK) were  
489 designed in-house using FreeCAD v0.19 (<https://www.freecadweb.org>). The chamber  
490 comprises a bottom holder and top cover, which fit together using a friction press fit to  
491 hold the alumina membrane in place, with culture medium compartments generated on  
492 each side of the membrane. The top cover contains a groove to hold a silicone gasket  
493 (product number 527-9790, RS Components Ltd. Corby, UK) with inner diameter of 7.65  
494 millimeter in place. AMC design files are available for non-commercial use and will be  
495 provided upon publication. The AMC designs were printed using an Original Prusa  
496 MINI+ (Prusa Research, Prague, Czech Republic) 3D printer with a 0.4 mm nozzle and  
497 a layer height of 0.2 mm. The AMCs were printed in 1.75 mm, clear, natural PLA  
498 filament (prod. number 832-0210, RS Components Ltd.).

499

500 ***Enteroid culture***

501 Human jejunal enteroids were established and cultured as described previously  
502 (15, 17). Briefly, pieces of intestinal resections were washed thoroughly in ice-cold PBS  
503 and epithelial crypts were subsequently dissociated using Gentle Cell Dissociation  
504 Reagent (STEMCELL Technologies, Vancouver, BC, Canada) by nutating at 4°C for 30  
505 minutes followed by trituration. The resulting epithelial fragments were filtered through a  
506 70 µm cell strainer and crypt-enriched fractions suspended in 50 µl Matrigel (Corning,  
507 Corning, NY, USA) domes in a 24 well plate. The embedded crypts were cultured in  
508 OGM (IntestiCult Organoid Growth Medium (Human), STEMCELL Technologies) with  
509 100 U/ml penicillin/streptomycin (Thermo Fisher (Gibco), Waltham, MA, USA) at 37°C  
510 and 5% CO<sub>2</sub>. Growth medium was refreshed every 2-3 days.

511 For maintenance of human enteroids, the structures were passaged weekly at a  
512 ratio of circa 1:8 by mechanical dissociation. The Matrigel domes were manually broken  
513 up by pipetting with Gentle Dissociation Reagent and then washed once with  
514 DMEM/F12/1.25% BSA. The resulting suspended enteroids were disrupted by triturating  
515 15-20 times with a 200ul pipet tip. Following disruption, enteroid fragments were again  
516 suspended in 50 µl Matrigel:Intesticult at the ratio 3:1, divided over 3 domes per well in  
517 a 24 well plate, and cultured at 37°C and 5% CO<sub>2</sub>.

518

519 ***Enteroid-derived IEC monolayer culture***

520 Human IEC monolayers were cultured on either 24-well transparent polyethylene  
521 terephthalate (PET) tissue culture inserts with 0.4 µm pores (Sarstedt, Nümbrecht,

522 Germany) or 13 mm diameter alumina Whatman Anodisc membranes. The PET  
523 transwell inserts were coated with 40× diluted Matrigel in PBS for one hour at room  
524 temperature prior to use. After this time, the coating was completely removed and the  
525 cell suspension was immediately added to the transwell inserts. The alumina  
526 membranes were coated with extracellular matrix as well, but required more extensive  
527 pretreatment. First, the alumina membranes were soaked in 30% H<sub>2</sub>O<sub>2</sub> for 1 hour at  
528 room temperature to add negatively charged hydroxyl groups to the surface (30) and  
529 allow protein binding. Then, the alumina membranes were washed in sterile dH<sub>2</sub>O and  
530 incubated in 0.1 mg/ml poly-L-lysine (Sigma-Aldrich, Stockholm, Sweden) in dH<sub>2</sub>O for 5  
531 minutes to prepare the surface for Matrigel coating. After poly-L-lysine coating, the  
532 membranes were air-dried in a laminar flow cabinet for ~2 hours or overnight. Finally,  
533 the alumina membranes were soaked in 40× diluted Matrigel in dH<sub>2</sub>O for 1 hour, and  
534 air-dried again. After coating, the membranes were mounted within AMCs.

535 Human enteroids were dissociated into single cell suspensions as described  
536 before (17). Briefly, circa one well of enteroids per membrane was dissociated into  
537 single cells at day 7 after passaging. The enteroids were first taken up from the Matrigel  
538 in Gentle Dissociation Reagent, then washed in PBS/1.25% BSA, and dissociated into  
539 single cells using TrypLE Express (Thermo Fisher (Gibco)) for 5-10 minutes at 37°C.  
540 Cells were then spun down at 300 rcf for 5 minutes and resuspended in OGM+Y (Rho  
541 kinase inhibitor Y-27632 (10 μM), Sigma). Finally, the cells were counted manually and  
542  $3.0 \times 10^5$  cells were seeded into the apical compartment of PET transwells in 150 μl  
543 (600 μl medium in bottom compartment, 24-well plate wells), or into the apical  
544 compartment of AMCs in 75 μl (600 μl medium in the bottom compartment, 12 well plate



545 wells). The monolayers typically grew confluent in 2-4 days, whereafter the cells were  
546 differentiated towards an enterocyte phenotype by deprivation of Wnt-signalling for 4-5  
547 days. The medium for differentiation consisted of DMEM/F12 supplemented with 5% R-  
548 Spondin1 conditioned medium (home made from Cultrex 293T R-spondin1-expressing  
549 cells, R&D Systems, MN, USA), 10% Noggin conditioned medium (home made with  
550 HEK293-mNoggin-Fc cells, kindly provided by Prof. Hans Clevers, Utrecht University),  
551 50 ng/ml mouse recombinant EGF (Sigma-Aldrich), 1X B27 supplement (Gibco), 1.25  
552 mM N-acetyl cysteine, and 100 U/ml penicillin/streptomycin (9, 10).

553

#### 554 ***Salmonella Typhimurium strain, plasmid, culture, and infection***

555 All *Salmonella* infections in this study were performed with *Salmonella enterica*  
556 serovar Typhimurium, SL1344 (SB300) (72). For validation by standard fluorescence  
557 microscopy, the strain carried a pFPV-mCherry (rpsM-mCherry; Addgene plasmid  
558 number 20956) plasmid directing constitutive mCherry expression (73). As reported  
559 previously, expression of this mCherry construct did not influence motility or invasive  
560 behavior of *Salmonella* SL1344. For IEC monolayer infections, *Salmonella* inoculi were  
561 grown in LB/0.3 M NaCl (Sigma-Aldrich) for 12 h overnight with 50 µg/ml ampicillin. The  
562 following day, a 1:20 dilution was subcultured in LB/0.3 M NaCl without antibiotics for 4  
563 h. For subsequent infection of monolayer cultures, the 4h inoculum was diluted to  
564  $1.0 \times 10^8$  CFU/ml in DMEM/F12 (Thermo Fisher (Gibco)) without antibiotics of which 10  
565 µl was used for each infection, resulting in  $1.0 \times 10^6$  CFU per monolayer.

566

567 ***Giardia intestinalis* culture and infection**

568 *Giardia intestinalis* isolate WB, clone C6 (ATCC 30957) was used in this study.  
569 For validation by standard fluorescence microscopy, a modified *Giardia* line  
570 constitutively expressing mNeonGreen was generated (see below). *Giardia* trophozoites  
571 were grown at 37°C in 10 ml flat plastic tubes (Thermo Fisher Nunc, MA, USA) or 50ml  
572 tubes (Sarstedt, Germany) filled with TYDK medium (also known as modified TYI-S-33  
573 or Keister's medium) (74), supplemented with 10% heat-inactivated bovine serum  
574 (Gibco, Thermo Fisher MA, United States). All materials used in the TYDK medium  
575 were purchased from Sigma-Aldrich (MO, USA) unless otherwise stated. For IEC  
576 monolayer infections, *Giardia* trophozoites were grown until approximately 70%  
577 confluence and washed once with TYDK to remove dead cells. Further, trophozoites  
578 were incubated on ice (12 min), counted and pelleted by centrifugation (800 x g, 10 min,  
579 4°C). Cells were washed once in 1 ml DMEM/F12 (Thermo Fisher (Gibco)), centrifuged  
580 and diluted to  $2 \times 10^7$  or  $4 \times 10^7$  trophozoites/ml using DMEM/F12 of which 10 $\mu$ l were  
581 used for infection, resulting in  $2 \times 10^5$  -  $4 \times 10^5$  trophozoites per monolayer.

582

583 ***mNeonGreen* plasmid construction and *Giardia* trophozoite transfection**

584 To visualize *Giardia* trophozoites on IEC monolayers also by fluorescence  
585 microscopy, we created a trophozoite strain constitutively expressing mNeonGreen  
586 under the control of the beta-giardin promoter. The mNeonGreen gene was PCR-  
587 amplified from the pNCS-mNeonGreen plasmid (Allele Biotechnology, CA, USA) and  
588 the beta-giardin 5'UTR and 3'UTR regions were amplified from genomic DNA of the WB  
589 isolate (see Table S1). The PCR fragments were fused by overlap extension PCR and

590 cloned into the integration vector pPacV-Integ-HA-C (75) using XbaI/PacI restriction  
591 sites. *Giardia* trophozoites were electroporated as previously described (76). Transgenic  
592 parasites that had the mNeonGreen expression cassette integrated on the chromosome  
593 were selected by adding puromycin (50µg/ml) to the culture medium approximately 16 h  
594 after transfection. To ensure homogeneous mNeonGreen expression in the culture, we  
595 created a clonal trophozoite population from the original mNeonGreen stable  
596 transfectant population using serial dilution. Briefly, the original trophozoite culture was  
597 diluted in TYDK and seeded as single cells into the wells of a 96-well plate. Wells  
598 reaching 70–80% confluence were selected and grown in 10 ml tubes containing TYDK.  
599 After the establishment of the clonal mNeonGreen strains the trophozoites were grown  
600 without antibiotics.

601

### 602 ***Fixed IEC monolayer imaging***

603 Differentiated IEC monolayers grown in AMCs were fixed in 4% PFA for 30 min  
604 and permeabilized with 0.1% Triton X-100 for 10 minutes. Then, the cells were stained  
605 with phalloidin-AF488 (Thermo Fisher) and 4',6-Diamidino-2-phenylindole  
606 dihydrochloride (DAPI, Sigma-Aldrich) counterstain for 30 min in PBS. Subsequently,  
607 the alumina membrane with cells was removed from the plastic membrane holder,  
608 washed, and mounted under a 0.17 µm coverslip in Mowiol 4-88 (Sigma-Aldrich). The  
609 samples were imaged on a Zeiss LSM700 inverted point-scanning microscope system  
610 with a 63X/1.4 NA oil immersion objective using a voxel size of 70.6 nm (x,y) and 0.54  
611 µm (z-sections).

612

613 ***Live cell infection imaging***

614 Live cell imaging was performed on an inverted Nikon Ti-eclipse microscope  
615 (Nikon Corporation, Tokyo, Japan) with a 60X/1.4 NA Nikon PLAN APO objective (0.19  
616 mm WD), Nikon condenser (0.52 NA, LWD), and Andor Zyla sCMOS camera  
617 (Abingdon, Oxfordshire, England) with pixel size of 108 nm for Fig 1C,D,F-I and a  
618 custom upright microscope for all other experiments. The upright microscope is a  
619 custom-build, largely based on the Thorlabs Cerna upright microscopy system (Newton,  
620 NJ, USA) with a heated 60X/1.0 NA Nikon CFI APO NIR objective (2.8 mm WD) and a  
621 Nikon D-CUO DIC Oil Condenser (1.4 NA) controlled by Micro-Manager 2.0-gamma  
622 (77). Images were acquired with an ORCA-Fusion camera (model number C14440-  
623 20UP, Hamamatsu photonics, Hamamatsu City, Japan), with a final pixel size of 109  
624 nm. Transmitted light was supplied by a 530 nm Thorlabs LED (M530L3) to minimize  
625 phototoxicity and chromatic aberrations. The microscope chamber was maintained at  
626 37°C in a moisturized 5% CO<sub>2</sub> atmosphere and an objective heater was used  
627 additionally. Samples in AMCs were mounted in 35 mm glass-bottom dishes (Cellvis,  
628 Mountain View, CA, USA) in 3 ml DMEM/F12 without antibiotics in the microscope's  
629 light path, and allowed to equilibrate for 30 minutes. Then, *Salmonella* or *Giardia* were  
630 added in pre-made dilutions directly underneath the objective, and imaging was started  
631 immediately with <20 ms exposure times for DIC imaging and <50 ms for fluorescence  
632 imaging.

633

634 **SEM imaging**

635 For SEM analysis of AMC-grown monolayers, *Salmonella* infected IEC  
636 monolayers were fixed at 40 minutes post-infection and compared with uninfected  
637 controls. To fix the samples, the monolayers were gently washed once with PBS and  
638 fixed at 4°C overnight with 2.5% glutaraldehyde (Sigma) in 0.1M PHEM buffer (60mM  
639 PIPES, 25mM HEPES, 10mM EGTA, and 4mM MgSO<sub>4</sub>·7H<sub>2</sub>O, pH 6.9). Prior to SEM  
640 imaging, the samples were dehydrated in series of graded ethanol, critical point dried  
641 (Leica EM CPD300) and coated with 5 nm platinum (Quorum Q150T-ES sputter coater).  
642 The sample morphology was examined by field-emission scanning electron microscope  
643 (FESEM; Carl Zeiss Merlin) using in-lens and in-chamber secondary electron detectors  
644 at accelerating voltage of 4 kV and probe current of 100 pA.

645

646 **Image processing**

647 The acquired microscopy images were processed with Fiji (78). DIC images in  
648 figures 2, 3, 4, and S3 were filtered to acquire an even field of illumination by  
649 subtracting a (30-pixel sigma) gaussian blurred projection from the original. Where  
650 indicated, a temporal median (TM) filter was used to extract quickly moving structures  
651 (e.g. motile *Salmonella*, *Giardia*, and moving flagella) by subtracting the median  
652 projection of the time stack from each individual frame. To enable automated particle  
653 tracking of moving *Salmonella* in DIC time series, pixel values of the signed 32-bit TM  
654 filtered stacks were squared to convert both 'dark' and 'light' bacteria in the TM-filtered  
655 image to positive values. These TM<sup>2</sup>-filtered images were used for automated particle

656 tracking. Both automated and manual particle tracking was performed with Trackmate  
657 for ImageJ v6.0.1 (34).

658

### 659 ***Tracking analysis and statistics***

660 Data analysis was performed with R (79) and RStudio (80) and packages  
661 available from the Comprehensive R Archive Network (CRAN, [https://cran.r-](https://cran.r-project.org/)  
662 [project.org/](https://cran.r-project.org/)). Tracking statistics were exported from Trackmate, and actual frame  
663 intervals were obtained from the image metadata using the Cellocity python package  
664 (81) to correct for variations between frames which would be reflected in inaccurate link  
665 speeds. Subsequently, the track data was formatted and plotted in R with the 'tidyverse'  
666 (82) package. Tracks with a mean speed of  $>100 \mu\text{m/s}$  were manually confirmed to be  
667 false positives of automated tracking, and therefore excluded from analysis. Track angle  
668 changes for DIC-tracked swimming paths were calculated using functions based on the  
669 'trajr' package (83) with an interval of three links. For the *Salmonella* swimming tracks,  
670 only tracks with a mean speed of  $>5 \mu\text{m/s}$  were included in the analysis to filter away  
671 most non-motile bacteria. The three-link angle change was divided by the distance  
672 travelled from the reference link to calculate the angle change per micron. To aid  
673 interpretation of this parameter, the angle change / micron was normalized to angle  
674 change / 15 micron, the average distance travelled in 3 links. Other supporting  
675 packages for R include 'ggpubr', 'rstatix', 'ggbeeswarm', 'viridis', 'ggribes', and 'scales'.  
676

677 **Acknowledgements**

678 Confocal imaging was performed at the BioVis microscopy core facility of  
679 Uppsala University. For SEM imaging at the NMI-UCEM (National Microscopy  
680 Infrastructure and Umeå Centre for Electron Microscopy) we express our gratitude  
681 towards Cheng Choo Lee for image processing and acquisition, Sara Henriksson for  
682 support with the fixation protocol, and Linda Sandblad for advice and facilitating the  
683 experiments.

684  
685 **Funding.** This work was supported by grants from the Swedish Research Council  
686 (2018-02223), the Swedish Foundation for Strategic Research (ICA16-0031 and FFL18-  
687 0165), and a Lennart Philipson Award (MOLPS, 2018) to MES. JMvR's position was  
688 financed by a SciLifeLab postdoctoral grant. JG and SGS received support from the  
689 Swedish Research Council (grant 2020-02342).

690  
691 **Contributions:** Conceptualization: JMvR, JE, MES; Methodology: JMvR, JE, JG, MES;  
692 Investigation: JMvR, JE, JG; Formal analysis: JMvR, JE, JG, MES; Resources: MS,  
693 DLW, PMH, SGS, MES; Supervision: SGS, MES; Project administration: MS, DLW,  
694 PMH, SGS, MES; Funding acquisition: SGS, PMH, MES; Visualization: JMvR, JG;  
695 Writing - Original Draft: JMvR, MES; Writing - Reviewing & Editing: all authors.

696  
697 **Conflict of interest:** The authors have no competing interests to declare.

698

699 **References**

- 700 1. Hume PJ, Singh V, Davidson AC, Koronakis V. 2017. Swiss Army Pathogen: The  
701 Salmonella Entry Toolkit. *Frontiers in Cellular and Infection Microbiology* 7:1–13.
- 702 2. Kellermann M, Scharte F, Hensel M. 2021. Manipulation of Host Cell Organelles by  
703 Intracellular Pathogens. *Int J Mol Sci* 22:6484.
- 704 3. Misselwitz B, Barrett N, Kreibich S, Vonaesch P, Andritschke D, Rout S, Weidner  
705 K, Sormaz M, Songhet P, Horvath P, Chabria M, Vogel V, Spori DM, Jenny P,  
706 Hardt WD. 2012. Near surface swimming of salmonella Typhimurium explains  
707 target-site selection and cooperative invasion. *PLoS Pathogens* 8:e1002810.
- 708 4. Chang Y-Y, Enninga J, Stévenin V. 2021. New methods to decrypt emerging  
709 macropinosome functions during the host-pathogen crosstalk. *Cell Microbiol*  
710 23:e13342.
- 711 5. Sousa MC, Gonçalves CA, Bairos VA, Poiaraes-Da-Silva J. 2001. Adherence of  
712 *Giardia lamblia* trophozoites to Int-407 human intestinal cells. *Clin Diagn Lab*  
713 *Immunol* 8:258–265.
- 714 6. Dowd GC, Mortuza R, Bhalla M, Van Ngo H, Li Y, Rigano LA, Ireton K. 2020.  
715 *Listeria monocytogenes* exploits host exocytosis to promote cell-to-cell spread.  
716 *Proc Natl Acad Sci USA* 117:3789–3796.
- 717 7. Spence JR, Mayhew CN, Rankin SA, Kuhar MF, Vallance JE, Tolle K, Hoskins EE,  
718 Kalinichenko VV, Wells SI, Zorn AM, Shroyer NF, Wells JM. 2011. Directed



- 719 differentiation of human pluripotent stem cells into intestinal tissue in vitro. *Nature*  
720 470:105–110.
- 721 8. Wells JM, Spence JR. 2014. How to make an intestine. *Development* 141:752–  
722 760.
- 723 9. Sato T, Stange DE, Ferrante M, Vries RGJ, Van Es JH, Van Den Brink S, Van  
724 Houdt WJ, Pronk A, Van Gorp J, Siersema PD, Clevers H. 2011. Long-term  
725 expansion of epithelial organoids from human colon, adenoma, adenocarcinoma,  
726 and Barrett’s epithelium. *Gastroenterology* 141:1762–1772.
- 727 10. Sato T, Vries RG, Snippert HJ, van de Wetering M, Barker N, Stange DE, van Es  
728 JH, Abo A, Kujala P, Peters PJ, Clevers H. 2009. Single Lgr5 stem cells build  
729 crypt-villus structures in vitro without a mesenchymal niche. *Nature* 459:262–265.
- 730 11. Dedhia PH, Bertaux-Skeirik N, Zavros Y, Spence JR. 2016. Organoid Models of  
731 Human Gastrointestinal Development and Disease. *Gastroenterology* 150:1098–  
732 1112.
- 733 12. Kim J, Koo B-K, Knoblich JA. 2020. Human organoids: model systems for human  
734 biology and medicine. *Nature Reviews Molecular Cell Biology* 21:571–584.
- 735 13. Blokzijl F, de Ligt J, Jager M, Sasselli V, Roerink S, Sasaki N, Huch M, Boymans  
736 S, Kujik E, Prins P, Nijman IJ, Martincorena I, Mokry M, Wiegerinck CL,  
737 Middendorp S, Sato T, Schwank G, Nieuwenhuis EES, Verstegen MMA, van der  
738 Laan LJW, de Jonge J, IJzermans JNM, Vries RG, van de Wetering M, Stratton

- 739 MR, Clevers H, Cuppen E, van Boxtel R. 2016. Tissue-specific mutation  
740 accumulation in human adult stem cells during life. *Nature* 538:260–264.
- 741 14. Sato T, Clevers H. 2013. Growing self-organizing mini-guts from a single intestinal  
742 stem cell: mechanism and applications. *Science* 340:1190–1194.
- 743 15. Geiser P, Di Martino ML, Samperio Ventayol P, Eriksson J, Sima E, Al-Saffar AK,  
744 Ahl D, Phillipson M, Webb D-L, Sundbom M, Hellström PM, Sellin ME. 2021.  
745 *Salmonella enterica* Serovar Typhimurium Exploits Cycling through Epithelial Cells  
746 To Colonize Human and Murine Enteroids. *mBio* 12:e02684-20.
- 747 16. Kim M, Fevre C, Lavina M, Disson O, Lecuit M. 2021. Live Imaging Reveals  
748 *Listeria* Hijacking of E-Cadherin Recycling as It Crosses the Intestinal Barrier. *Curr*  
749 *Biol* 31:1037-1047.e4.
- 750 17. Samperio Ventayol P, Geiser P, Di Martino ML, Florbrant A, Fattinger SA, Walder  
751 N, Sima E, Shao F, Gekara NO, Sundbom M, Hardt W-D, Webb D-L, Hellström  
752 PM, Eriksson J, Sellin ME. 2021. Bacterial detection by NAIP/NLRC4 elicits prompt  
753 contractions of intestinal epithelial cell layers. *Proc Natl Acad Sci U S A*  
754 118:e2013963118.
- 755 18. Moon C, VanDussen KL, Miyoshi H, Stappenbeck TS. 2013. Development of a  
756 primary mouse intestinal epithelial cell monolayer culture system to evaluate  
757 factors that modulate IgA transcytosis. *Mucosal immunology* 7:818–828.

- 758 19. VanDussen KL, Marinshaw JM, Shaikh N, Miyoshi H, Moon C, Tarr PI, Ciorba MA,  
759 Stappenbeck TS. 2014. Development of an enhanced human gastrointestinal  
760 epithelial culture system to facilitate patient-based assays. *Gut* 64:911–920.
- 761 20. Ettayebi K, Crawford SE, Murakami K, Broughman JR, Karandikar U, Tenge VR,  
762 Neill FH, Blutt SE, Zeng X-L, Qu L, Kou B, Opekun AR, Burrin D, Graham DY,  
763 Ramani S, Atmar RL, Estes MK. 2016. Replication of human noroviruses in stem  
764 cell-derived human enteroids. *Science* 353:1387–1393.
- 765 21. In J, Foulke-Abel J, Zachos NC, Hansen A-M, Kaper JB, Bernstein HD, Halushka  
766 M, Blutt S, Estes MK, Donowitz M, Kovbasnjuk O. 2016. Enterohemorrhagic  
767 *Escherichia coli* Reduces Mucus and Intermicrovillar Bridges in Human Stem Cell-  
768 Derived Colonoids. *Cellular and Molecular Gastroenterology and Hepatology* 2:48-  
769 62.e3.
- 770 22. Kim R, Attayek PJ, Wang Y, Furtado KL, Tamayo R, Sims CE, Allbritton NL. 2019.  
771 An in vitro intestinal platform with a self-sustaining oxygen gradient to study the  
772 human gut/microbiome interface. *Biofabrication* 12:015006.
- 773 23. Koestler BJ, Ward CM, Fisher CR, Rajan A, Maresso AW, Payne SM. 2019.  
774 Human Intestinal Enteroids as a Model System of *Shigella* Pathogenesis. *Infect*  
775 *Immun* 87:e00733-18.
- 776 24. Nakamoto N, Sasaki N, Aoki R, Miyamoto K, Suda W, Teratani T, Suzuki T, Koda  
777 Y, Chu P-S, Taniki N, Yamaguchi A, Kanamori M, Kamada N, Hattori M, Ashida H,  
778 Sakamoto M, Atarashi K, Narushima S, Yoshimura A, Honda K, Sato T, Kanai T.

- 779 2019. Gut pathobionts underlie intestinal barrier dysfunction and liver T helper 17  
780 cell immune response in primary sclerosing cholangitis. *Nat Microbiol* 4:492–503.
- 781 25. Ranganathan S, Doucet M, Grassel CL, Delaine-Elias B, Zachos NC, Barry EM.  
782 2019. Evaluating *Shigella flexneri* Pathogenesis in the Human Enteroid Model.  
783 *Infect Immun* 87:e00740-18.
- 784 26. Sasaki N, Miyamoto K, Maslowski KM, Ohno H, Kanai T, Sato T. 2020.  
785 Development of a Scalable Coculture System for Gut Anaerobes and Human  
786 Colon Epithelium. *Gastroenterology* 159:388-390.e5.
- 787 27. Wilke G, Funkhouser-Jones LJ, Wang Y, Ravindran S, Wang Q, Beatty WL,  
788 Baldrige MT, VanDussen KL, Shen B, Kuhlenschmidt MS, Kuhlenschmidt TB,  
789 Witola WH, Stappenbeck TS, Sibley LD. 2019. A Stem-Cell-Derived Platform  
790 Enables Complete *Cryptosporidium* Development In Vitro and Genetic Tractability.  
791 *Cell Host & Microbe* 26:123-134.e8.
- 792 28. Nickerson KP, Llanos-Chea A, Ingano L, Serena G, Miranda-Ribera A, Perlman M,  
793 Lima R, Sztein MB, Fasano A, Senger S, Faherty CS. 2021. A Versatile Human  
794 Intestinal Organoid-Derived Epithelial Monolayer Model for the Study of Enteric  
795 Pathogens. *Microbiol Spectr* e0000321.
- 796 29. Charles-Orszag A, Tsai FC, Bonazzi D, Manriquez V, Sachse M, Mallet A, Salles  
797 A, Melican K, Staneva R, Bertin A, Millien C, Goussard S, Lafaye P, Shorte S, Piel  
798 M, Krijnse-Locker J, Brochard-Wyart F, Bassereau P, Duménil G. 2018. Adhesion

- 799 to nanofibers drives cell membrane remodeling through one-dimensional wetting.  
800 Nature Communications 9:4450.
- 801 30. Formentín P, Catalán, Pol L, Fernández-Castillejo S, Solà R, Marsal LF. 2018.  
802 Collagen and fibronectin surface modification of nanoporous anodic alumina and  
803 macroporous silicon for endothelial cell cultures. Journal of Biological Engineering  
804 12:1–9.
- 805 31. van Dongen SFM, Maiuri P, Piel M. 2014. Chapter 11 - A Reagent-Based Dynamic  
806 Trigger for Cell Adhesion, Shape Change, or Cocultures, p. 171–184. *In* Piel, M,  
807 Théry, M (eds.), *Methods in Cell Biology*. Academic Press.
- 808 32. Lenaghan SC, Davis CA, Henson WR, Zhang Z, Zhang M. 2011. High-speed  
809 microscopic imaging of flagella motility and swimming in *Giardia lamblia*  
810 trophozoites. PNAS 108:E550–E558.
- 811 33. Furter M, Sellin ME, Hansson GC, Hardt WD. 2019. Mucus Architecture and Near-  
812 Surface Swimming Affect Distinct *Salmonella Typhimurium* Infection Patterns along  
813 the Murine Intestinal Tract. Cell Reports 27:2665-2678.e3.
- 814 34. Tinevez J-Y, Perry N, Schindelin J, Hoopes GM, Reynolds GD, Laplantine E,  
815 Bednarek SY, Shorte SL, Eliceiri KW. 2017. TrackMate: An open and extensible  
816 platform for single-particle tracking. Methods 115:80–90.
- 817 35. Spöring I, Martinez VA, Hotz C, Schwarz-Linek J, Grady KL, Nava-Sedeño JM,  
818 Vissers T, Singer HM, Rohde M, Bourquin C, Hatzikirou H, Poon WCK, Dufour YS,

- 819 Erhardt M. 2018. Hook length of the bacterial flagellum is optimized for maximal  
820 stability of the flagellar bundle. *PLOS Biology* 16:e2006989.
- 821 36. Cooper KG, Chong A, Kari L, Jeffrey B, Starr T, Martens C, McClurg M, Posada  
822 VR, Laughlin RC, Whitfield-Cargile C, Garry Adams L, Bryan LK, Little SV, Krath  
823 M, Lawhon SD, Steele-Mortimer O. 2021. Regulatory protein HilD stimulates  
824 *Salmonella Typhimurium* invasiveness by promoting smooth swimming via the  
825 methyl-accepting chemotaxis protein McpC. *Nat Commun* 12:348.
- 826 37. Horstmann JA, Zschieschang E, Truschel T, de Diego J, Lunelli M, Rohde M, May  
827 T, Strowig T, Stradal T, Kolbe M, Erhardt M. 2017. Flagellin phase-dependent  
828 swimming on epithelial cell surfaces contributes to productive *Salmonella* gut  
829 colonisation. *Cell Microbiol* 19:e12739.
- 830 38. Otte S, Ipiña EP, Pontier-Bres R, Czerucka D, Peruani F. 2021. Statistics of  
831 pathogenic bacteria in the search of host cells. *Nat Commun* 12:1990.
- 832 39. Einarsson E, Ma'ayeh S, Svärd SG. 2016. An up-date on *Giardia* and giardiasis.  
833 *Current Opinion in Microbiology* 34:47–52.
- 834 40. Hagen KD, McInally SG, Hilton ND, Dawson SC. 2020. Chapter Two - Microtubule  
835 organelles in *Giardia*, p. 25–96. *In* Ortega-Pierres, MG (ed.), *Advances in*  
836 *Parasitology*. Academic Press.
- 837 41. Lenaghan SC, Chen J, Zhang M. 2013. Modeling and analysis of propulsion in the  
838 multiflagellated microorganism *Giardia lamblia*. *Phys Rev E Stat Nonlin Soft Matter*  
839 *Phys* 88:012726.

- 840 42. Misselwitz B, Kreibich SK, Rout S, Stecher B, Periaswamy B, Hardt WD. 2011.  
841 *Salmonella enterica* serovar typhimurium binds to hela cells via fim-mediated  
842 reversible adhesion and irreversible type three secretion system 1-mediated  
843 docking. *Infection and Immunity* 79:330–341.
- 844 43. Lara-Tejero M, Galán JE. 2009. *Salmonella enterica* serovar Typhimurium  
845 pathogenicity island 1-encoded type III secretion system translocases mediate  
846 intimate attachment to nonphagocytic cells. *Infection and Immunity* 77:2635–2642.
- 847 44. Gerlach RG, Jäckel D, Stecher B, Wagner C, Lupas A, Hardt W-D, Hensel M.  
848 2007. *Salmonella* Pathogenicity Island 4 encodes a giant non-fimbrial adhesin and  
849 the cognate type 1 secretion system. *Cell Microbiol* 9:1834–1850.
- 850 45. Horstmann JA, Lunelli M, Cazzola H, Heidemann J, Kühne C, Steffen P, Szefs S,  
851 Rossi C, Lokareddy RK, Wang C, Lemaire L, Hughes KT, Uetrecht C, Schlüter H,  
852 Grassl GA, Stradal TEB, Rossez Y, Kolbe M, Erhardt M. 2020. Methylation of  
853 *Salmonella* Typhimurium flagella promotes bacterial adhesion and host cell  
854 invasion. *Nat Commun* 11:2013.
- 855 46. Fattinger SA, Böck D, Martino MLD, Deuring S, Ventayol PS, Ek V, Furter M,  
856 Kreibich S, Bosia F, Müller-Hauser AA, Nguyen BD, Rohde M, Pilhofer M, Hardt W-  
857 D, Sellin ME. 2020. *Salmonella* Typhimurium discreet-invasion of the murine gut  
858 absorptive epithelium. *PLOS Pathogens* 16:e1008503.
- 859 47. Jepson MA, Kenny B, Leard AD. 2001. Role of sipA in the early stages of  
860 *Salmonella typhimurium* entry into epithelial cells. *Cellular Microbiology* 3:417–426.

- 861 48. Kommnick C, Lepper A, Hensel M. 2019. Correlative light and scanning electron  
862 microscopy (CLSEM) for analysis of bacterial infection of polarized epithelial cells.  
863 *Scientific reports* 9:17079.
- 864 49. Knodler LA, Vallance BA, Celli J, Winfree S, Hansen B, Montero M, Steele-  
865 Mortimer O. 2010. Dissemination of invasive *Salmonella* via bacterial-induced  
866 extrusion of mucosal epithelia. *Proc Natl Acad Sci U S A* 107:17733–17738.
- 867 50. Sellin ME, Müller AA, Felmy B, Dolowschiak T, Diard M, Tardivel A, Maslowski KM,  
868 Hardt WD. 2014. Epithelium-intrinsic NAIP/NLRC4 inflammasome drives infected  
869 enterocyte expulsion to restrict salmonella replication in the intestinal mucosa. *Cell*  
870 *Host and Microbe* 16:237–248.
- 871 51. Laughlin RC, Knodler LA, Barhoumi R, Payne HR, Wu J, Gomez G, Pugh R,  
872 Lawhon SD, Bäumlér AJ, Steele-Mortimer O, Adams LG. 2014. Spatial segregation  
873 of virulence gene expression during acute enteric infection with *Salmonella*  
874 *enterica* serovar Typhimurium. *mBio* 5:e00946-13.
- 875 52. House SA, Richter DJ, Pham JK, Dawson SC. 2011. *Giardia* Flagellar Motility Is  
876 Not Directly Required to Maintain Attachment to Surfaces. *PLoS Pathog*  
877 7:e1002167.
- 878 53. Hansen WR, Fletcher DA. 2008. Tonic Shock Induces Detachment of *Giardia*  
879 *lamblia*. *PLoS Negl Trop Dis* 2:e169.



- 880 54. Wilson SS, Tocchi A, Holly MK, Parks WC, Smith JG. 2015. A small intestinal  
881 organoid model of non-invasive enteric pathogen-epithelial cell interactions.  
882 *Mucosal Immunol* 8:352–361.
- 883 55. Bartfeld S, Bayram T, van de Wetering M, Huch M, Begthel H, Kujala P, Vries R,  
884 Peters PJ, Clevers H. 2015. In vitro expansion of human gastric epithelial stem  
885 cells and their responses to bacterial infection. *Gastroenterology* 148:126-136.e6.
- 886 56. Zhao X, Li C, Liu X, Chiu MC, Wang D, Wei Y, Chu H, Cai J-P, Chan IH-Y, Wong  
887 KK-Y, Chan JF-W, To KK-W, Yuen KY, Zhou J. 2021. Human Intestinal Organoids  
888 Recapitulate Enteric Infections of Enterovirus and Coronavirus. *Stem Cell Reports*  
889 16:493–504.
- 890 57. Co JY, Margalef-Català M, Li X, Mah AT, Kuo CJ, Monack DM, Amieva MR. 2019.  
891 Controlling Epithelial Polarity: A Human Enteroid Model for Host-Pathogen  
892 Interactions. *Cell Reports* 26:2509-2520.e4.
- 893 58. Perrett CA, Jepson MA. 2009. Regulation of Salmonella-induced membrane ruffling  
894 by SipA differs in strains lacking other effectors. *Cellular Microbiology* 11:475–487.
- 895 59. Stecher B, Hapfelmeier S, Müller C, Kremer M, Stallmach T, Hardt W-D. 2004.  
896 Flagella and chemotaxis are required for efficient induction of Salmonella enterica  
897 serovar Typhimurium colitis in streptomycin-pretreated mice. *Infect Immun*  
898 72:4138–4150.

- 899 60. Woodward SE, Krekhno Z, Finlay BB. 2019. Here, there, and everywhere: How  
900 pathogenic *Escherichia coli* sense and respond to gastrointestinal biogeography.  
901 *Cellular Microbiology* 21:e13107.
- 902 61. Crowley SM, Han X, Allaire JM, Stahl M, Rauch I, Knodler LA, Vallance BA. 2020.  
903 Intestinal restriction of *Salmonella Typhimurium* requires caspase-1 and caspase-  
904 11 epithelial intrinsic inflammasomes. *PLoS pathogens* 16:e1008498.
- 905 62. Holly MK, Han X, Zhao EJ, Crowley SM, Allaire JM, Knodler LA, Vallance BA,  
906 Smith JG. 2020. *Salmonella enterica* infection of murine and human enteroid-  
907 derived monolayers elicits differential activation of epithelial-intrinsic  
908 inflammasomes. *Infection and Immunity* 88:00017–00020.
- 909 63. Fattinger SA, Geiser P, Samperio Ventayol P, Di Martino ML, Furter M, Felmy B,  
910 Bakkeren E, Hausmann A, Barthel-Scherrer M, Gül E, Hardt W-D, Sellin ME. 2021.  
911 Epithelium-autonomous NAIP/NLRC4 prevents TNF-driven inflammatory  
912 destruction of the gut epithelial barrier in *Salmonella*-infected mice. *Mucosal*  
913 *Immunol* 14:615–629.
- 914 64. Rauch I, Deets KA, Ji DX, von Moltke J, Tenthorey JL, Lee AY, Philip NH, Ayres  
915 JS, Brodsky IE, Gronert K, Vance RE. 2017. NAIP-NLRC4 Inflammasomes  
916 Coordinate Intestinal Epithelial Cell Expulsion with Eicosanoid and IL-18 Release  
917 via Activation of Caspase-1 and -8. *Immunity* 46:649–659.
- 918 65. Holberton DV. 1973. Fine structure of the ventral disk apparatus and the  
919 mechanism of attachment in the flagellate *Giardia muris*. *J Cell Sci* 13:11–41.

- 920 66. Dawson SC. 2010. An insider's guide to the microtubule cytoskeleton of Giardia.  
921 Cell Microbiol 12:588–598.
- 922 67. Campanati L, Holloschi A, Troster H, Spring H, Souza W de, Monteiro-Leal LH.  
923 2002. Video-microscopy observations of fast dynamic processes in the protozoon  
924 Giardia lamblia. Cell Motility 51:213–224.
- 925 68. Chen J, Lenaghan SC, Zhang M. 2012. Analysis of dynamics and planar motion  
926 strategies of a swimming microorganism — Giardia lamblia, p. 4204–4209. *In* 2012  
927 IEEE International Conference on Robotics and Automation.
- 928 69. Lisicki M, Velho Rodrigues MF, Goldstein RE, Lauga E. 2019. Swimming  
929 eukaryotic microorganisms exhibit a universal speed distribution. eLife 8:e44907.
- 930 70. Erlandsen SL, Russo AP, Turner JN. 2004. Evidence for Adhesive Activity of the  
931 Ventrolateral Flange in Giardia lamblia. Journal of Eukaryotic Microbiology 51:73–  
932 80.
- 933 71. Middendorp S, Schneeberger K, Wiegerinck CL, Mokry M, Akkerman RDL, Van  
934 Wijngaarden S, Clevers H, Nieuwenhuis EES. 2014. Adult stem cells in the small  
935 intestine are intrinsically programmed with their location-specific function. Stem  
936 Cells 32:1083–1091.
- 937 72. Hoiseth SK, Stocker BA. 1981. Aromatic-dependent Salmonella typhimurium are  
938 non-virulent and effective as live vaccines. Nature 291:238–239.

- 939 73. Drecktrah D, Levine-Wilkinson S, Dam T, Winfree S, Knodler LA, Schroer TA,  
940 Steele-Mortimer O. 2008. Dynamic Behavior of Salmonella-Induced Membrane  
941 Tubules in Epithelial Cells. *Traffic* 9:2117–2129.
- 942 74. Keister DB. 1983. Axenic culture of *Giardia lamblia* in TYI-S-33 medium  
943 supplemented with bile. *Trans R Soc Trop Med Hyg* 77:487–488.
- 944 75. Morf L, Spycher C, Rehrauer H, Fournier CA, Morrison HG, Hehl AB. 2010. The  
945 transcriptional response to encystation stimuli in *Giardia lamblia* is restricted to a  
946 small set of genes. *Eukaryot Cell* 9:1566–1576.
- 947 76. Jerlström-Hultqvist J, Stadelmann B, Birkestedt S, Hellman U, Svärd SG. 2012.  
948 Plasmid vectors for proteomic analyses in *Giardia*: purification of virulence factors  
949 and analysis of the proteasome. *Eukaryot Cell* 11:864–873.
- 950 77. Edelstein AD, Tsuchida MA, Amodaj N, Pinkard H, Vale RD, Stuurman N. 2014.  
951 Advanced methods of microscope control using  $\mu$ Manager software. 2. *Journal of*  
952 *Biological Methods* 1:1-e10.
- 953 78. Schindelin J, Arganda-Carreras I, Frise E, Kaynig V, Longair M, Pietzsch T,  
954 Preibisch S, Rueden C, Saalfeld S, Schmid B, Tinevez J-Y, White DJ, Hartenstein  
955 V, Eliceiri K, Tomancak P, Cardona A. 2012. Fiji: an open-source platform for  
956 biological-image analysis. *Nature methods* 9:676–682.
- 957 79. R Core Team. 2021. R: A Language and Environment for Statistical Computing. R  
958 Foundation for Statistical Computing, Vienna, Austria.

- 959 80. RStudio Team. 2021. RStudio: Integrated Development Environment for R.  
960 RStudio, PBC, Boston, MA.
- 961 81. Eriksson J, Styrström D, Sellin M. 2021. Cellocity: A Python package for analysis of  
962 confluent cell layer dynamics. *Journal of Open Source Software* 6:2818.
- 963 82. Wickham H, Averick M, Bryan J, Chang W, McGowan LD, François R, Grolemund  
964 G, Hayes A, Henry L, Hester J, Kuhn M, Pedersen TL, Miller E, Bache SM, Müller  
965 K, Ooms J, Robinson D, Seidel DP, Spinu V, Takahashi K, Vaughan D, Wilke C,  
966 Woo K, Yutani H. 2019. Welcome to the tidyverse. *Journal of Open Source  
967 Software* 4:1686.
- 968 83. McLean DJ, Volponi MAS. 2018. trajr: An R package for characterisation of animal  
969 trajectories. *Ethology* 124:440–448.
- 970

971 **Figure legends**

972 **Figure 1. High-definition live cell DIC imaging of IEC monolayer infections in a**  
973 **novel alumina membrane chamber.** Schematic comparison of assemblies for IEC  
974 monolayer culture highlight that PET transwell membrane holders have a large plastic  
975 support (A), which has been omitted in the novel AMCs (B). Both structures were placed  
976 in a 35 mm glass bottom dish for imaging. The lower height of AMCs allows for closer  
977 proximity, and thus greater numerical aperture, of the microscope's objective and  
978 condenser. The optical interference caused by the large plastic transwell support and  
979 resulting larger working distances of both objective and condenser is illustrated by live  
980 cell imaging of infections in intact PET transwells in an inverted microscope (C,F,G)  
981 versus cut-out PET membranes using an upright water-dipping microscope (D,H,I). This  
982 change in microscope setup improved the lateral resolution of bacteria (*Salmonella*) on  
983 the cell surface (F,H) and the apical surface topology of IECs (G,I). Either bacteria or  
984 surface topology could be emphasized by slightly changing the focal plane, as indicated  
985 on the right. Replacing the PET membrane with an alumina membrane held within the  
986 custom-designed AMC (E) further improved the imaging resolution and minimized  
987 optical interference (J,K). AMCs allow for sequential imaging of the same sample with  
988 DIC and SEM (L-N). The latter confirmed that differentiated IECs grown in AMCs exhibit  
989 a highly interconnected epithelium with a densely microvilliated surface. Bacteria are  
990 indicated with yellow arrow heads. Overlaid dashed lines indicate cell-cell junctions.  
991 White and yellow scale bars: 10 and 1  $\mu\text{m}$ , respectively.

992

993 **Figure 2. Tracking of microbes on IEC monolayers using DIC imaging resolve**  
994 ***Salmonella* and *Giardia* motility patterns.** Confluent, differentiated IEC monolayers in  
995 AMCs were infected with *Salmonella-mCherry* (A-B) or *Giardia-mNeonGreen* (C-D).  
996 The figure shows tracking from DIC time-lapse movies. Tracking using the respective  
997 fluorescent markers (for validation purposes) is shown in Fig S2. DIC movies were  
998 processed using a gaussian filter (DIC-GF) to remove uneven background illumination  
999 and achieve optimal contrast for *Salmonella* (A, top panel) and *Giardia* (C, top panel).  
1000 Subsequently, the total DIC-GF stack temporal median projection was subtracted from  
1001 every frame to specifically emphasize moving structures (TM), and pixel values were  
1002 squared ( $TM^2$ ) to yield positive (white) pixels on a zero (black) background. The  $TM^2$   
1003 filtered time series was used to track all visible *Salmonella* using automated particle  
1004 tracking (A, bottom panel). For *Giardia*, the TM filtered images were used for manual  
1005 tracking of swimming trophozoites (C, bottom panel). A random sample of tracks within  
1006 the field of view (FOV) was used to visualize *Salmonella* motility (B), while all manually  
1007 tracked paths are shown for *Giardia* (D). The population mean and standard deviation  
1008 for the track speeds were calculated based on all available tracks (Fig S2C,D). In A and  
1009 C, a representation of the focal plane (red) is indicated on the right. Tracked microbes  
1010 are indicated by magenta circles, tracks by continuous colored lines. Overlaid dashed  
1011 lines indicate cell-cell junctions. Scale bars: 10  $\mu$ m.

1012

1013 **Figure 3. *Salmonella* infection cycle stages at the apical IEC surface.** Differentiated  
1014 IEC monolayers were infected with *Salmonella* and imaged every 15 s. *Salmonella* was  
1015 most commonly observed to attach to the apical surface for the duration of the

1016 experiment (A). A fraction of bacteria was unsuccessful in establishing a lasting  
1017 adhesion, seen as a short attachment and sudden disappearance (A, asterisk). In other  
1018 cases, *Salmonella* disappeared from the surface after prolonged attachment either in  
1019 the absence of visible IEC surface perturbation (B, top row panels), or concomitant with  
1020 the induction of phenotypically small and discreet (B, middle row panels), or larger  
1021 donut-shaped (B, bottom row panels) host cell invasion structures. *Salmonella* invasion  
1022 elicited prompt extrusion of some targeted IECs (C, top panel), which involved an  
1023 inward movement of the surrounding IECs, evident from an overlaid drawing of the cell-  
1024 cell junctions (C, bottom panel). Throughout, a representation of the focal plane (red) is  
1025 indicated on the right. Bacteria are indicated with yellow, and invasion structures with  
1026 red arrow heads. Yellow asterisks indicate disappearing bacteria (detachment or  
1027 invasion). Overlaid dashed lines indicate cell-cell junctions. Scale bars: 10  $\mu\text{m}$ .

1028

1029 **Figure 4. *Giardia* trophozoite exploration of the IEC surface.** The link speeds of  
1030 *Giardia* tracks from Fig 2C,D was analyzed (see also Fig S4) and a representative track  
1031 showing the common circular pattern was plotted on the DIC (A, top panel) and TM  
1032 filtered (A, bottom panel and enlarged crop) images. Upon inspection of link speeds, the  
1033 trophozoite was found to swim with highly variable speeds within a single track (B). The  
1034 mean, minimum, and maximum speed for this track are indicated (B). During planar  
1035 swimming, the trophozoite intermittently paused upon sections of the epithelium (B,  
1036 black arrows), in one location each of the four times the trophozoite visited that  
1037 particular area (B, white arrow). Upon closer inspection of a single, attached trophozoite  
1038 (C), the TM filtered time stack showed movement of individual flagellar pairs, which



1039 could be manually segmented to follow their shape and position over time (C, middle-  
1040 and bottom panel to the right, respectively). In A, a representation of the focal plane  
1041 (red) is indicated on the right. Tracked microbes are indicated by magenta circles,  
1042 tracks by continuous yellow lines. Yellow- and red arrow heads indicate continuously  
1043 attached and temporarily attached *Giardia* respectively. The enlarged trophozoite is  
1044 indicated with a yellow square. Scale bars: 10  $\mu$ m.

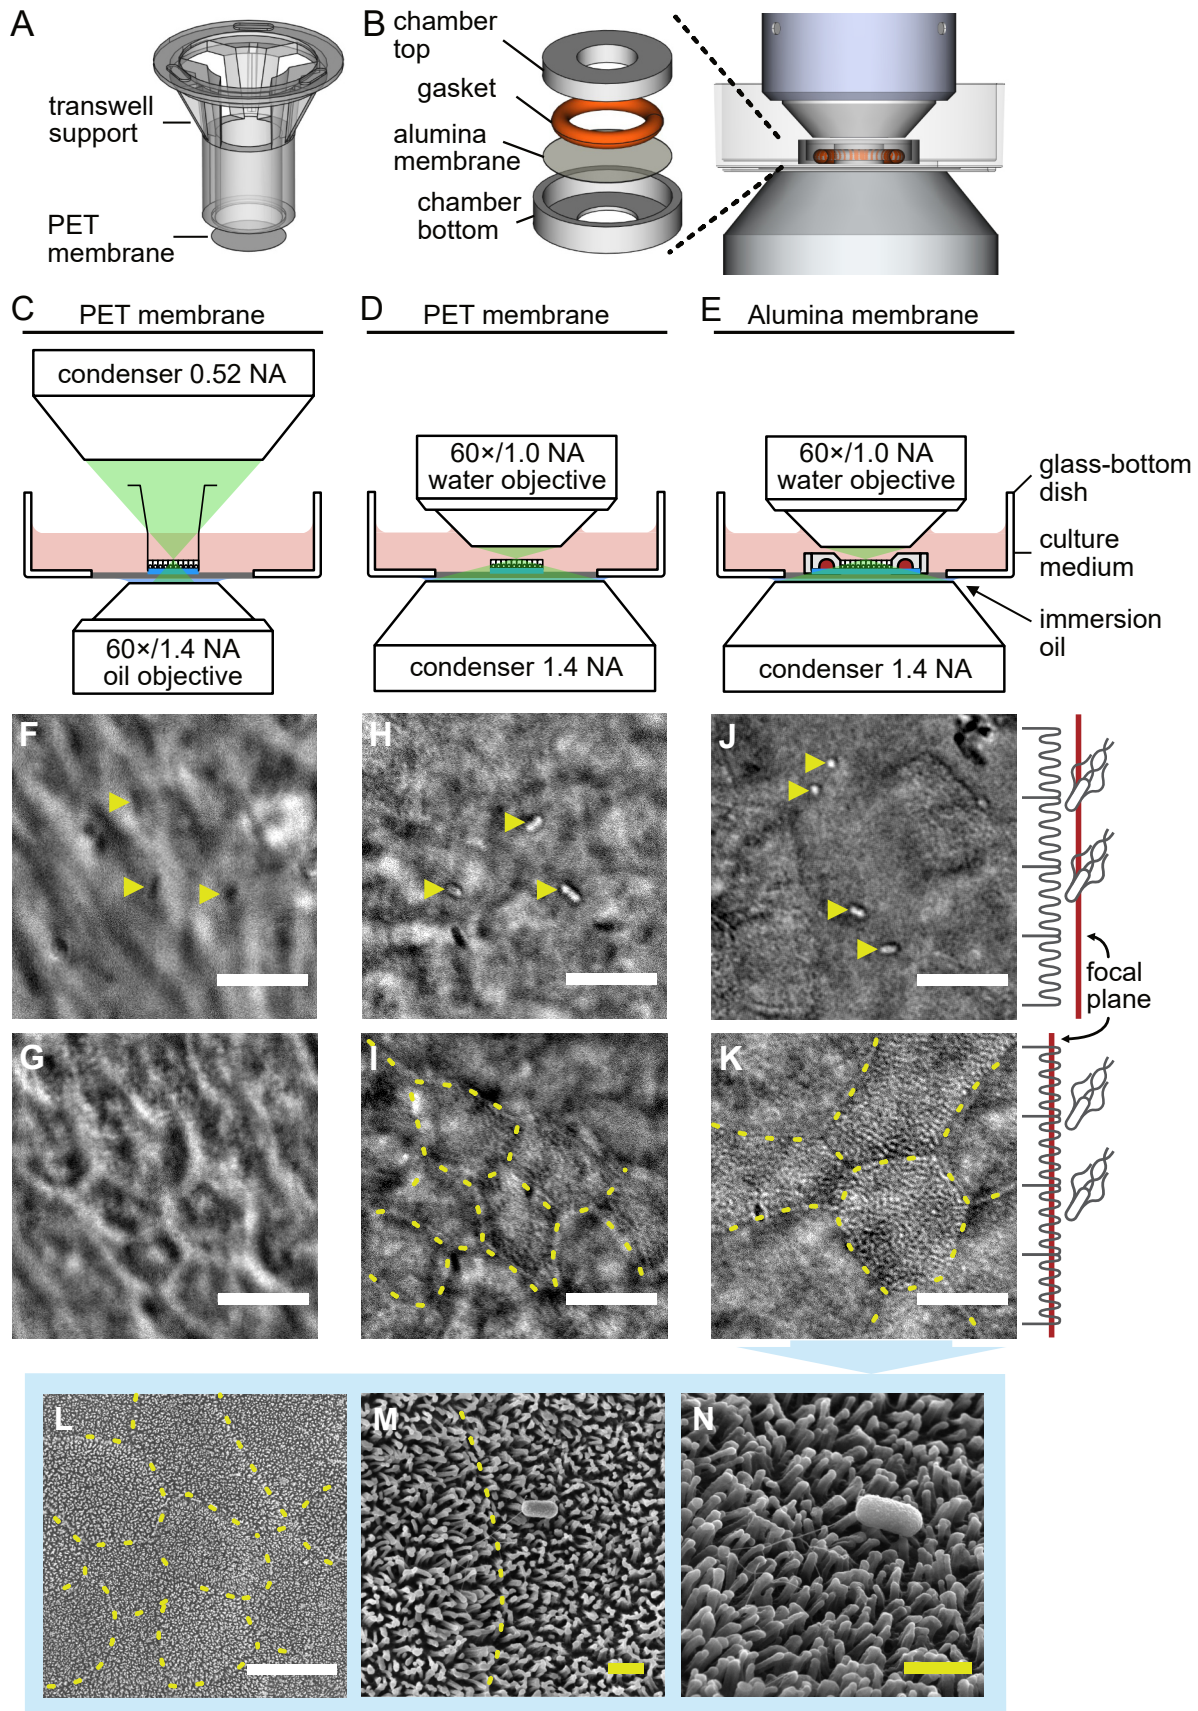

**Figure 1. High-definition live cell DIC imaging of IEC monolayer infections in a novel alumina membrane chamber.**

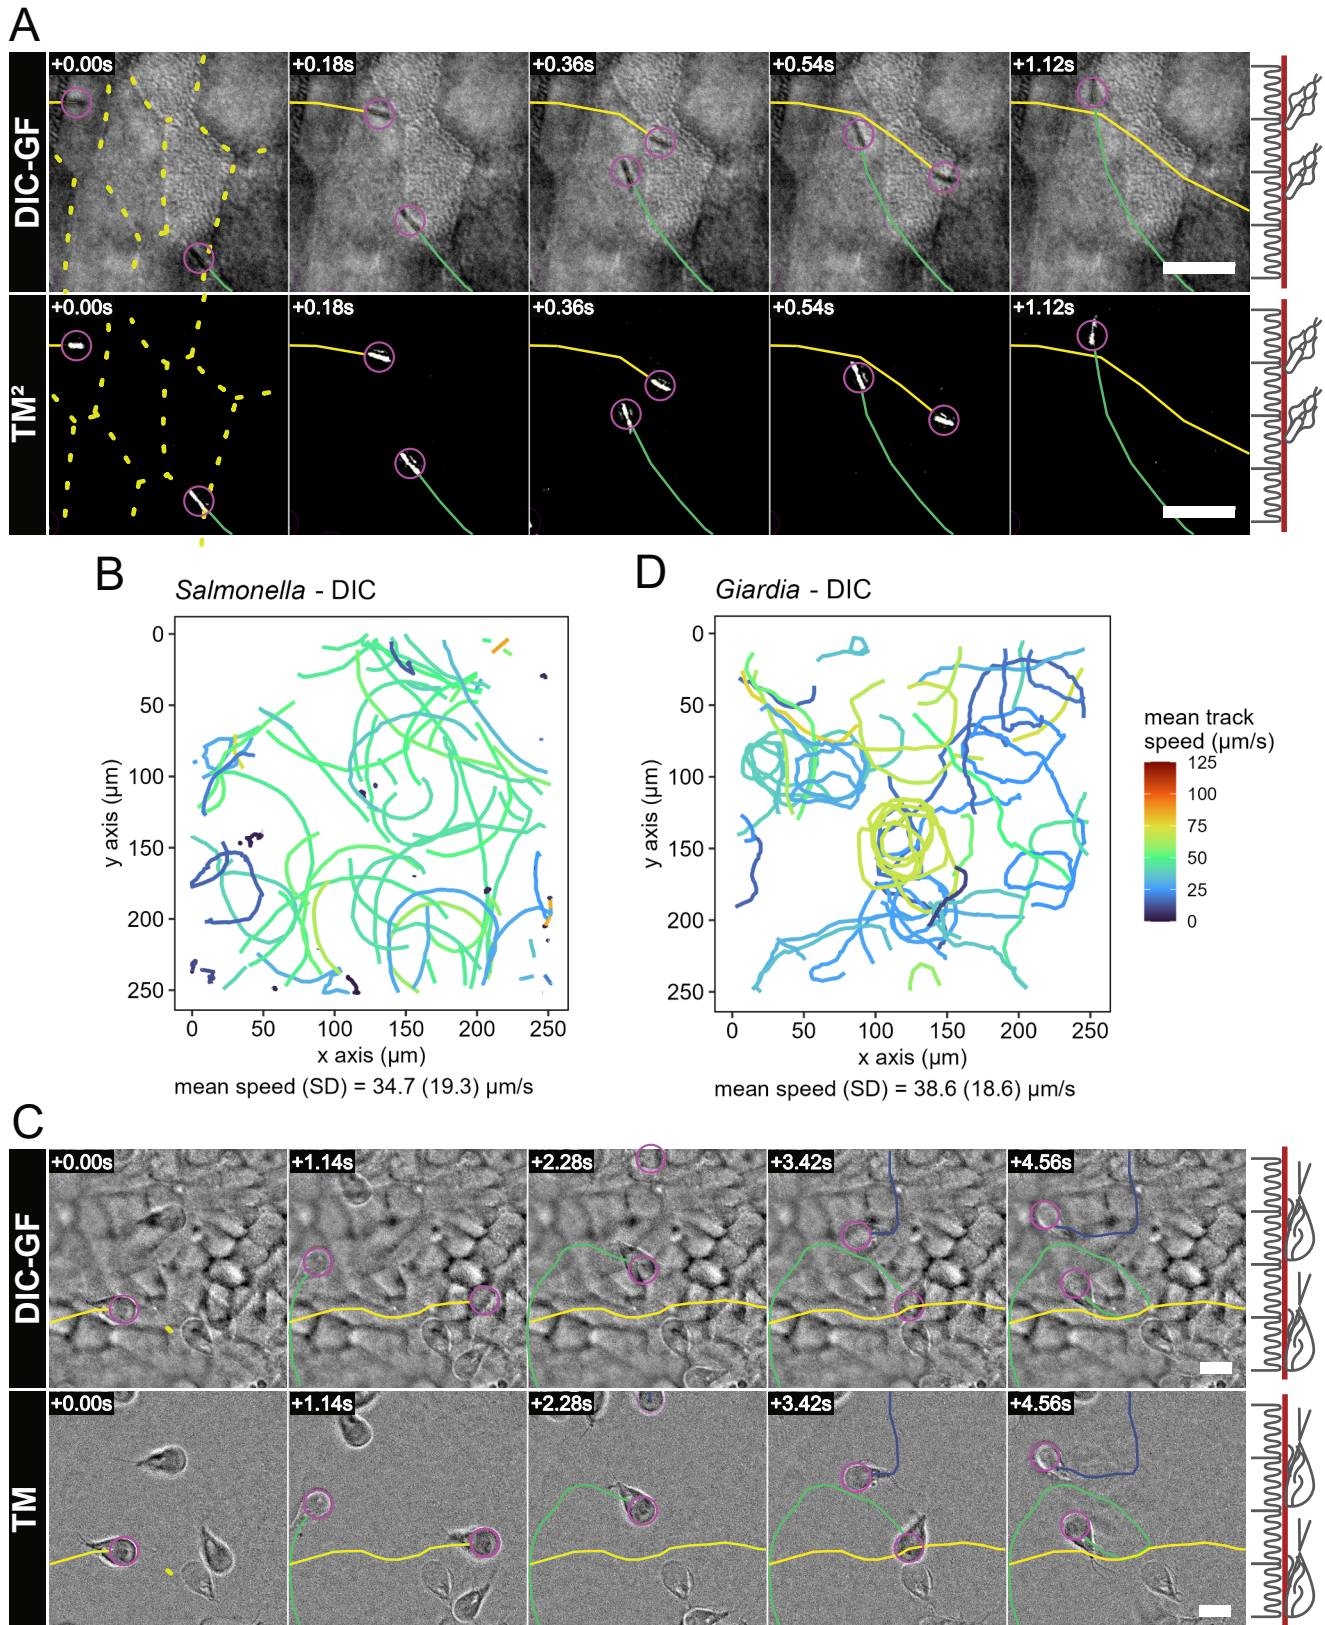

**Figure 2. Tracking of microbes on IEC monolayers using DIC imaging resolve *Salmonella* and *Giardia* motility patterns.**



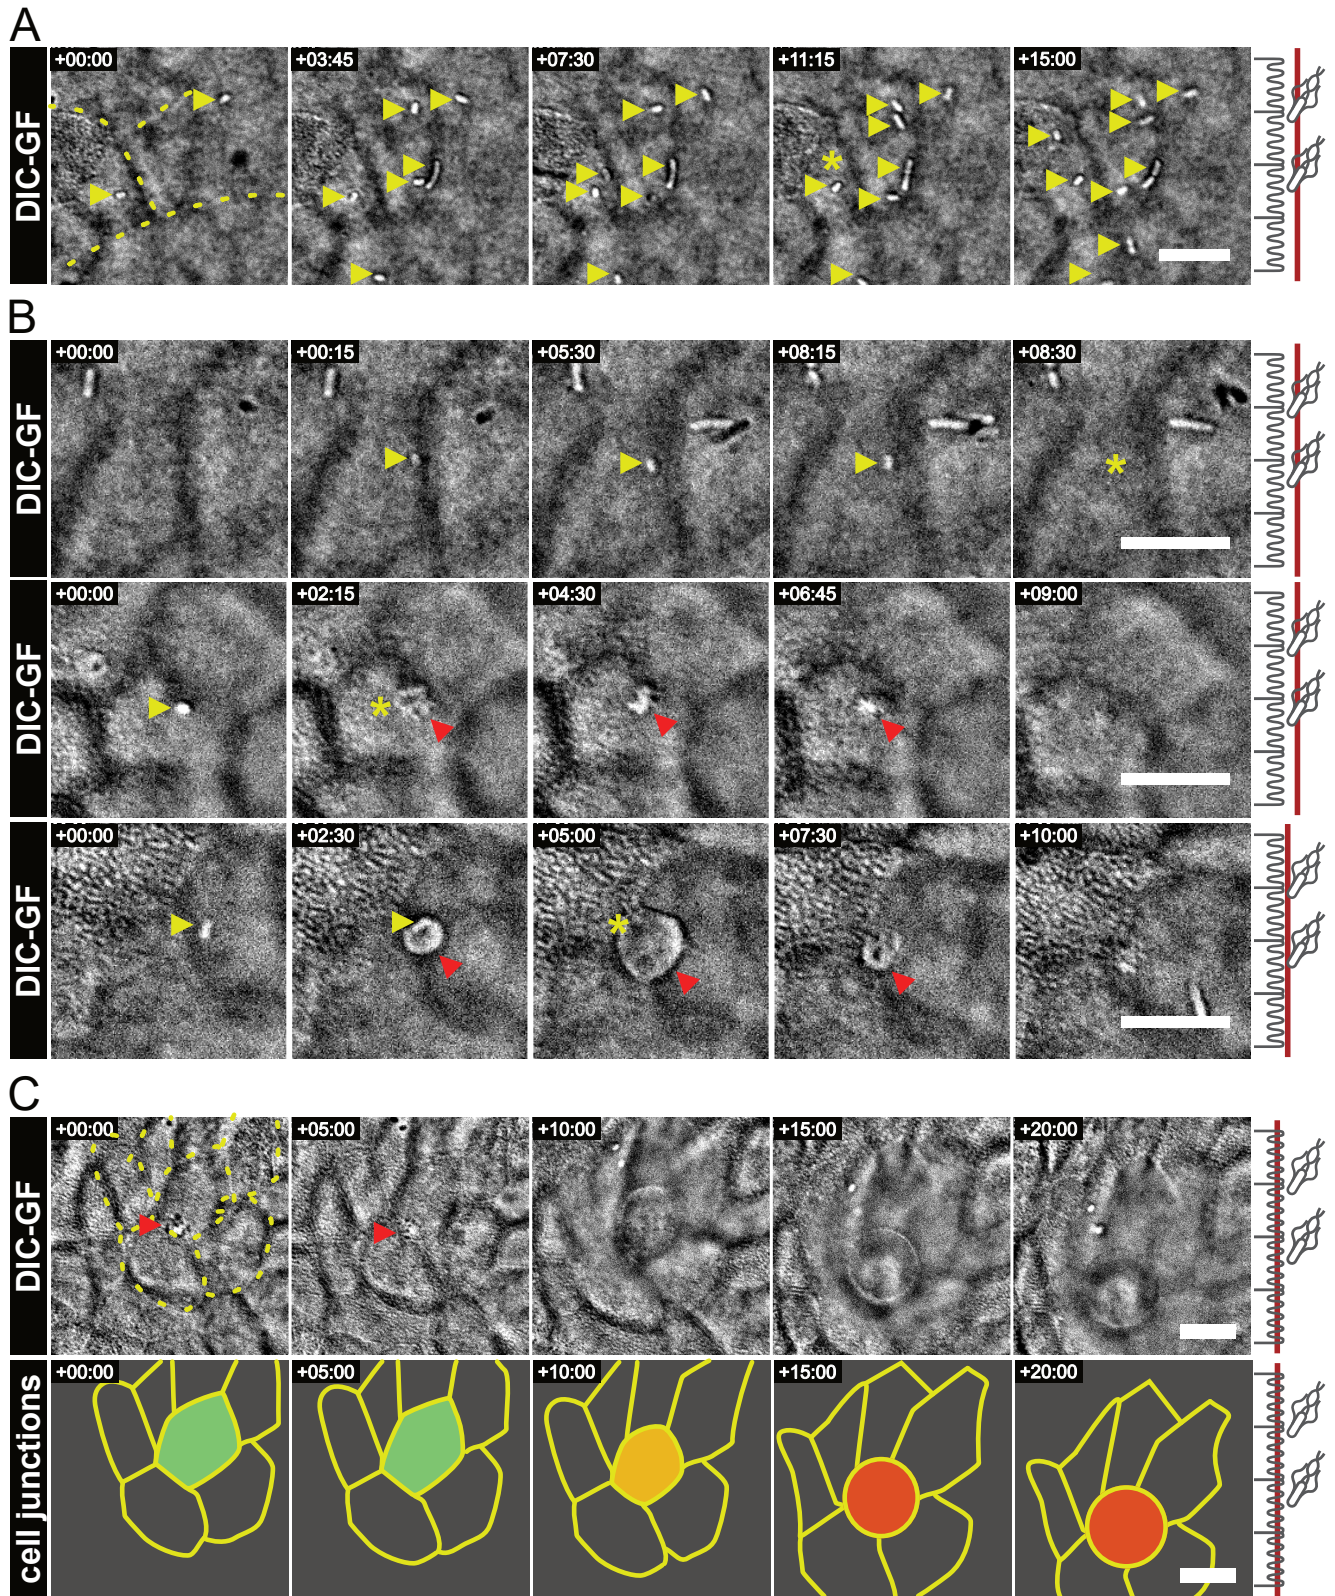

Figure 3. Salmonella infection cycle stages at the apical IEC surface.



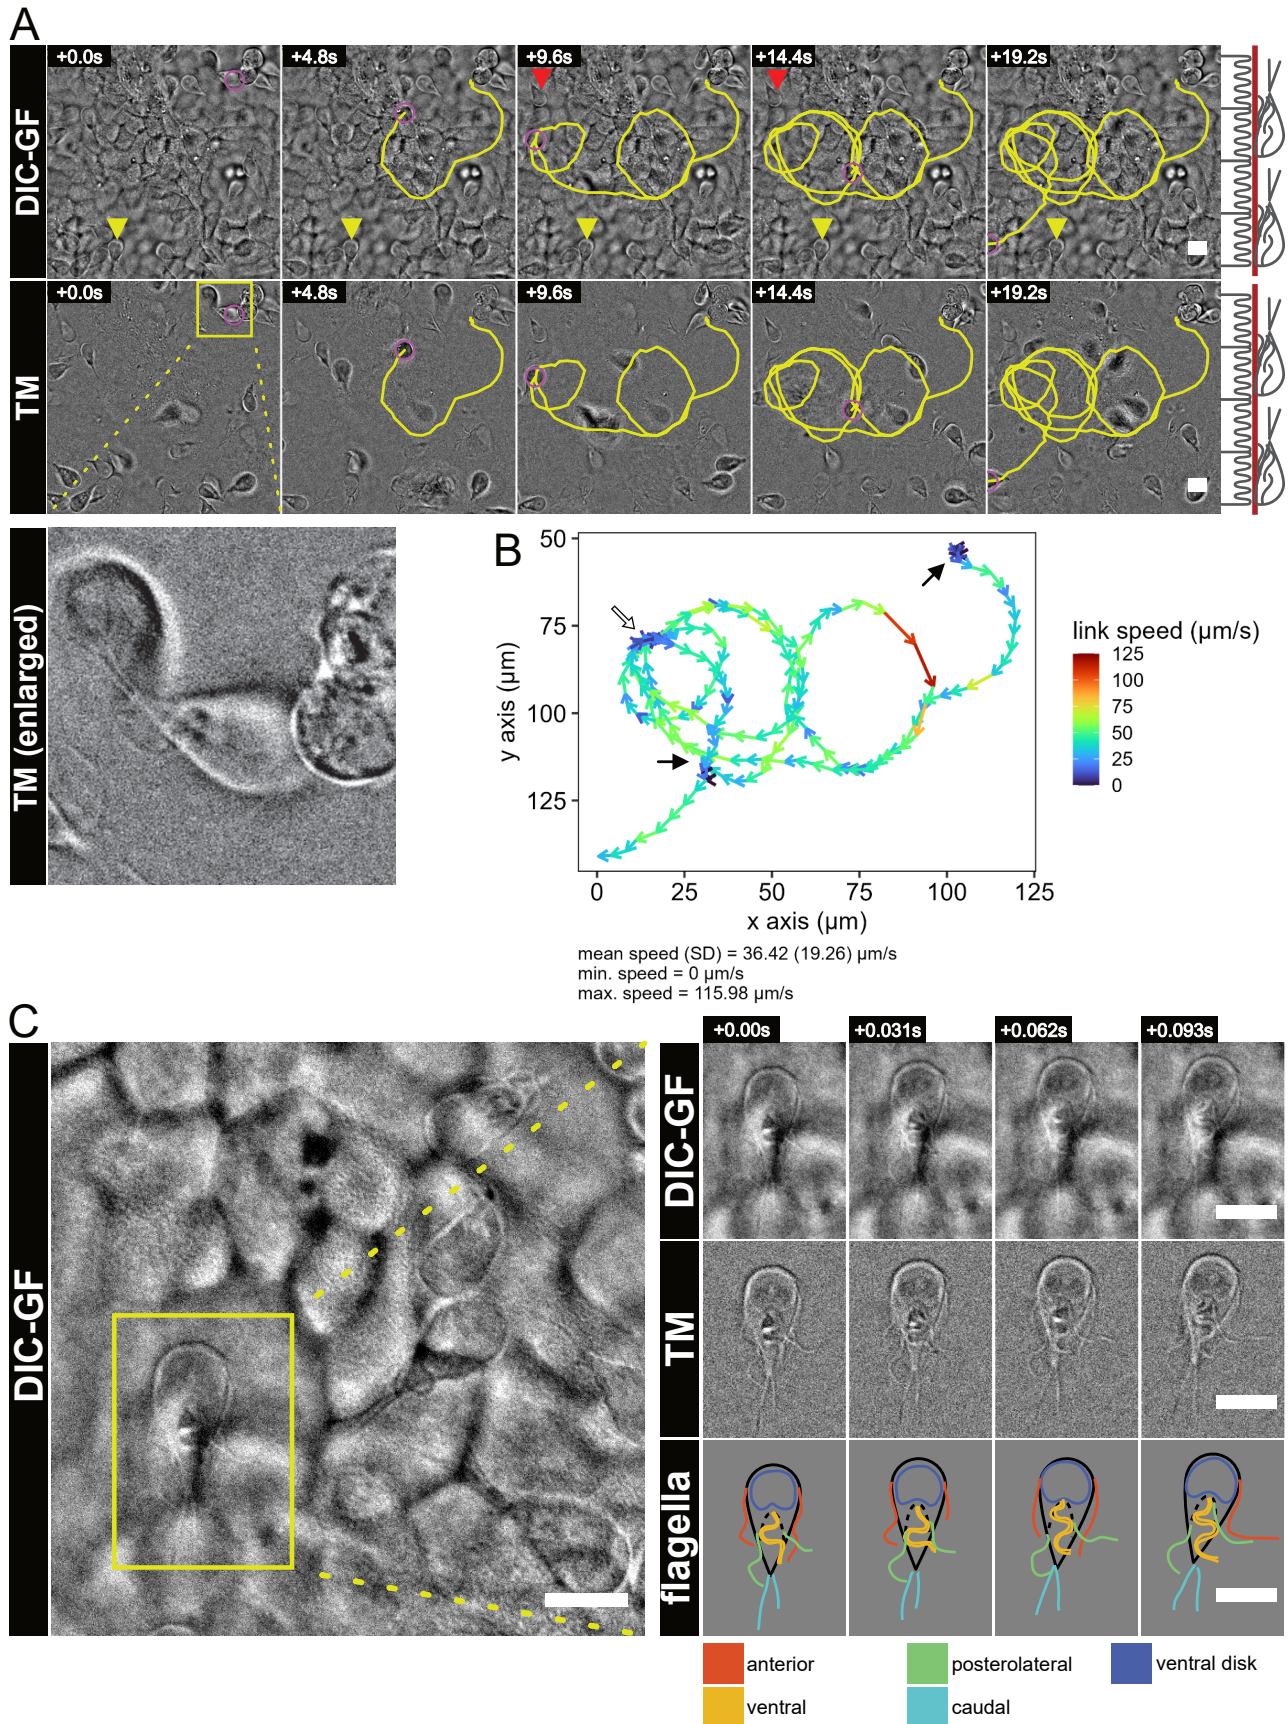

**Figure 4. Giardia trophozoite exploration of the IEC surface.**
